# Supplementary material for: TFA/TBHP-promoted oxidative cyclisation for the construction of tetracyclic quinazolinones and rutaecarpine
Source: Royal Society of Chemistry journal article supplement (doi:10.1039/d0qo00345j), 2020-01-01

## Supporting Information available

# TFA/TBHP-Promoted Oxidative Cyclisation for the Construction of Tetracyclic Quinazolinones and Rutaecarpine

Feng-Cheng Jia,<sup>\*a</sup> Tian-Zhi Chen,<sup>a</sup> and Xiao-Qiang Hu<sup>\*b</sup>

---

<sup>a</sup>School of Chemistry and Environmental Engineering, Wuhan Institute of Technology, Wuhan 430073, China.

E-mail: fengcheng-jia@wit.edu.cn.

<sup>b</sup>Key Laboratory of Catalysis and Energy Materials Chemistry of Ministry of Education & Hubei Key Laboratory of Catalysis and Materials Science, School of Chemistry and Materials Science, South-Central University for Nationalities, Wuhan 430074, China.

E-mail: huxiaoqiang@mail.scuec.edu.cn

| Table of Contents                                                                      | Pages   |
|----------------------------------------------------------------------------------------|---------|
| 1. General.....                                                                        | S2      |
| 2. Experimental procedures .....                                                       | S2-S3   |
| 3. Spectral data of compound <b>3aa-3ad</b> , <b>Rutaecarpine</b> , <b>5a-5b</b> ..... | S4-S10  |
| 4. Reference.....                                                                      | S10     |
| 5. Appendix: spectral copies of <sup>1</sup> H NMR, and <sup>13</sup> C NMR .....      | S11-S32 |

---

## 1. General

1. All isatins (**1a-1o**), 1,2,3,4-tetrahydroisoquinolines (**2a-2e**) and other reagents were obtained from commercial suppliers and used without further purification. Compound **7<sup>1</sup>** is obtained by removing hydrochloric acid from commercially purchased 6,7-dimethoxy-3,4-dihydroisoquinoline, hydrochloride (CAS: 20232-39-7) with sodium hydroxide solution. Compound **8<sup>2</sup>** was prepared from according to the reported methods. TLC analysis was performed using pre-coated glass plates. Column chromatography was performed using silica gel (200-300 mesh). <sup>1</sup>H NMR spectra were recorded on a Varian Mercury 400 or 600 MHz spectrometer. Chemical shifts are reported in ppm, relative to the internal standard of tetramethylsilane (TMS). HRMS were obtained on an Apex-Ultra MS equipped with an electrospray source. Melting points were determined using XT-4 apparatus and not corrected.

## 2. Experimental procedures

### 1. General procedure for preparation of 3 (3aa as an example)

**General procedure:** A sealed tube was charged with isatin **1a** (74 mg, 0.5 mmol), 1,2,3,4-tetrahydroisoquinoline **2a** (67 mg, 0.5 mmol), TBHP (tert-Butyl hydroperoxide, 70% solution in water, 192 mg, 1.5 mmol) and TFA (17 mg, 0.15 mmol) at room temperature, and then dried solvent Tol(4 mL) was added. The resulting mixture was stirred at 120 °C in a sealed vessel under air, after disappearance of the reactant (monitored by TLC), then added 50mL water to the mixture, extracted with EtOAc 3 times (3 × 50 mL). The extract was washed with 30% NaCl solution (V/V), dried over anhydrous Na<sub>2</sub>SO<sub>4</sub> and concentrated under reduced pressure. The residue was purified by column chromatography on silica gel (Petroleum ether / ethyl acetate = 10:1) to yield the desired product **3aa** as a white solid (75% yield).

### 2. Further Functionalization of product 5la

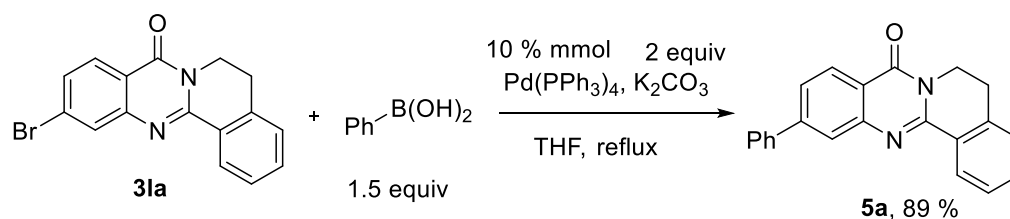

An oven dried Schlenk tube of 10 mL equipped with a magnetic stir bar was charged with **3la** (0.3 mmol), phenylboronic acid (1.5 equiv, 0.45 mmol) Pd(PPh<sub>3</sub>)<sub>4</sub> (10 mol%) and K<sub>2</sub>CO<sub>3</sub> (2 equiv, 0.6 mmol). and THF (3 mL) was added under nitrogen atmosphere, and the mixture was refluxed for 12 h. After cooling down to room temperature, the precipitate was removed by filtration and washed with EtOAc, and the filtrate was washed with brine, dried over Na<sub>2</sub>SO<sub>4</sub> and then concentrated under vacuum. The residue was purified by column chromatography on silica gel and eluted with petroleum ether/ethyl acetate (20/1) to afford a white solid **5a** in 89% yield (86 mg).

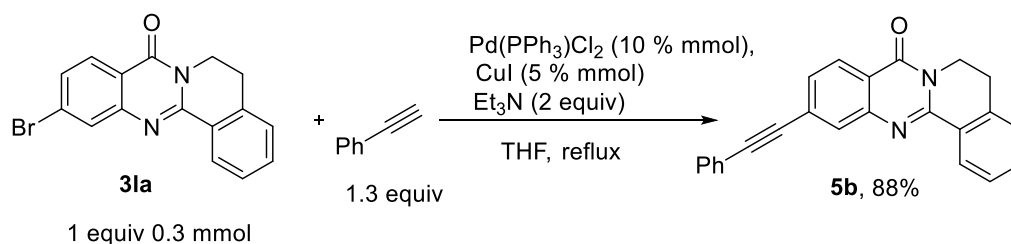

An oven dried Schlenk tube of 10 mL equipped with a magnetic stir bar was charged with **3a** (0.3 mmol), Pd(PPh<sub>3</sub>)<sub>2</sub>Cl<sub>2</sub> (10 mol %) and CuI (5 mol %). After charging nitrogen for three times, phenylacetylene (0.39 mmol, 1.3 eq.), Et<sub>3</sub>N (0.6 mmol, 2 equiv.) and THF (3 mL) was added under nitrogen atmosphere, and the mixture was refluxed for 12 h. After cooling down to room temperature, the precipitate was removed by filtration and washed with EtOAc, and the filtrate was washed with brine, dried over anhydrous Na<sub>2</sub>SO<sub>4</sub> and then concentrated under vacuum. The residue was purified by column chromatography on silica gel and eluted with petroleum ether/ethyl acetate (20/1) to afford a white solid **5b** in 88% yield (92 mg).

### 3. Spectral data of compound 3aa-3ad, Rutaecarpine

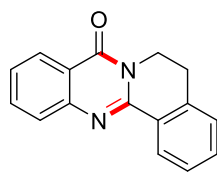

#### 5,6-dihydro-8H-isoquinolino[1,2-b]quinazolin-8-one (3aa) <sup>3</sup>

<sup>1</sup>H NMR (400 MHz, CDCl<sub>3</sub>)  $\delta$  = 8.50 (d,  $J$  = 7.6 Hz, 1H), 8.31 (d,  $J$  = 8.0 Hz, 1H), 7.84–7.69 (m, 2H), 7.53–7.39 (m, 3H), 7.28 (d,  $J$  = 7.2 Hz, 1H), 4.41 (t,  $J$  = 6.4 Hz, 2H), 3.10 (t,  $J$  = 6.4 Hz, 2H). <sup>13</sup>C NMR (100 MHz, CDCl<sub>3</sub>)  $\delta$  = 161.6, 149.2, 147.7, 136.9, 134.1, 131.6, 129.4, 127.9, 127.49, 127.47, 127.4, 126.7, 126.4, 120.6, 39.5, 27.3.

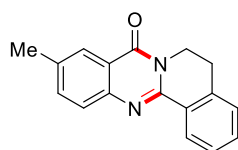

#### 10-methyl-5,6-dihydro-8H-isoquinolino[1,2-b]quinazolin-8-one (3ba) <sup>3</sup>

<sup>1</sup>H NMR (400 MHz, CDCl<sub>3</sub>)  $\delta$  = 8.49 (d,  $J$  = 7.2 Hz, 1H), 8.10 (s, 1H), 7.71 (d,  $J$  = 8.4 Hz, 1H), 7.58 (d,  $J$  = 8.0, 1H), 7.50–7.39 (m, 2H), 7.28 (d,  $J$  = 7.6 Hz, 1H), 4.41 (t,  $J$  = 6.4 Hz, 2H), 3.10 (t,  $J$  = 6.4 Hz, 2H), 2.50 (s, 3H). <sup>13</sup>C NMR (100 MHz, CDCl<sub>3</sub>)  $\delta$  = 161.6, 148.5, 145.7, 136.8, 136.6, 135.7, 131.4, 129.5, 127.8, 127.5, 127.4, 127.3, 126.2, 120.3, 39.5, 27.4, 21.3.

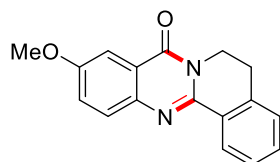

#### 10-methoxy-5,6-dihydro-8H-isoquinolino[1,2-b]quinazolin-8-one (3ca) <sup>3</sup>

<sup>1</sup>H NMR (600 MHz, CDCl<sub>3</sub>)  $\delta$  = 8.37 (d,  $J$  = 7.8 Hz, 1H), 7.63 (d,  $J$  = 9.0 Hz, 1H), 7.59 (s, 1H), 7.45–7.32 (m, 2H), 7.32–7.25 (m, 1H), 7.20 (d,  $J$  = 6.6 Hz, 1H), 4.36 (t,  $J$  = 6.6 Hz, 2H), 3.88 (s, 3H), 3.04 (t,  $J$  = 6.0 Hz, 2H). <sup>13</sup>C NMR (150 MHz, CDCl<sub>3</sub>)  $\delta$  = 161.1, 158.0, 147.0, 142.2, 136.4, 131.0, 129.4, 128.9, 127.4, 127.3, 127.2, 124.3, 121.2, 105.9, 55.6, 39.5, 27.2.

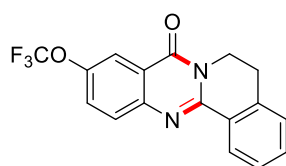

#### 10-(trifluoromethoxy)-5,6-dihydro-8H-isoquinolino[1,2-b]quinazolin-8-one (3da)

white solid. m.p.:194-195 °C. <sup>1</sup>H NMR (400 MHz, CDCl<sub>3</sub>)  $\delta$  = 8.45 (d,  $J$  = 7.6 Hz, 1H),

8.12 (s, 1H), 7.78 (d,  $J = 8.8$  Hz, 1H), 7.58-7.54 (m, 1H), 7.50-7.40 (m, 2H), 7.28(d,  $J = 7.2$  Hz, 1H), 4.40 (t,  $J = 6.8$  Hz, 2H), 3.10 (t,  $J = 6.4$  Hz, 2H).  $^{13}\text{C}$  NMR (100 MHz,  $\text{CDCl}_3$ )  $\delta = 160.9, 149.7, 147.0, 146.3, 137.0, 132.0, 129.6, 129.1, 128.0, 127.7, 127.5, 121.7, 121.5, 119.2, 118.1, 39.7, 27.3$ . HRMS (ESI) calcd for  $\text{C}_{17}\text{H}_{12}\text{F}_3\text{N}_2\text{O}_2$  ( $\text{M}+\text{H}$ ) $^+$  333.0851, found 333.0852.

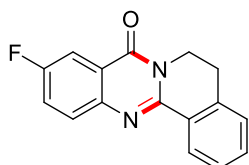

**10-fluoro-5,6-dihydro-8H-isoquinolino[1,2-b]quinazolin-8-one (3ea)**<sup>2</sup>

$^1\text{H}$  NMR (600 MHz,  $\text{CDCl}_3$ )  $\delta = 8.44$  (d,  $J = 7.8$  Hz, 1H), 7.94-7.90 (m, 1H), 7.78-7.74 (m,  $J = 9.0, 4.8$  Hz, 1H), 7.49-7.40 (m, 3H), 7.28 (d,  $J = 7.8$  Hz, 1H), 4.40 (t,  $J = 6.6$  Hz, 2H), 3.10 (t,  $J = 6.0$  Hz, 2H).  $^{13}\text{C}$  NMR (150 MHz,  $\text{CDCl}_3$ )  $\delta = 161.5, 161.0, 159.9, 148.7, 144.4, 136.9, 131.8, 129.94, 129.88, 129.2, 127.9, 127.6, 127.5, 122.9, 122.8, 121.8, 111.7, 111.5, 39.7, 27.3$ .

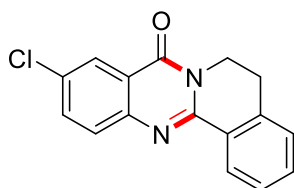

**10-chloro-5,6-dihydro-8H-isoquinolino[1,2-b]quinazolin-8-one (3fa)**<sup>3</sup>

$^1\text{H}$  NMR (600 MHz,  $\text{CDCl}_3$ )  $\delta = 8.44$  (d,  $J = 7.8$  Hz, 1H), 8.24 (s, 1H), 7.71-7.64 (m, 2H), 7.48 (t,  $J = 7.8$  Hz, 1H), 7.43 (t,  $J = 7.2$  Hz, 1H), 7.28 (d,  $J = 7.2$  Hz, 1H), 4.39 (t,  $J = 6.6$  Hz, 2H), 3.10 (t,  $J = 6.6$  Hz, 2H).  $^{13}\text{C}$  NMR (150 MHz,  $\text{CDCl}_3$ )  $\delta = 160.6, 149.6, 146.2, 137.0, 134.6, 132.1, 131.9, 129.2, 129.1, 128.0, 127.6, 127.5, 126.1, 121.6, 39.7, 27.3$ .

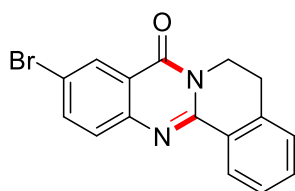

**10-bromo-5,6-dihydro-8H-isoquinolino[1,2-b]quinazolin-8-one (3ga)**<sup>3</sup>

$^1\text{H}$  NMR (600 MHz,  $\text{CDCl}_3$ )  $\delta = 8.44$  (d,  $J = 7.8$  Hz, 1H), 8.41 (s, 1H), 7.83-7.75 (m, 1H), 7.62 (d,  $J = 9.0$  Hz, 1H), 7.48 (t,  $J = 7.2$  Hz, 1H), 7.43 (t,  $J = 7.8$  Hz, 1H), 7.28 (d,  $J = 7.2$  Hz, 1H), 4.39 (t,  $J = 6.6$  Hz, 2H), 3.10 (t,  $J = 6.0$  Hz, 2H).  $^{13}\text{C}$  NMR (150 MHz,  $\text{CDCl}_3$ )  $\delta = 160.5, 149.7, 146.5, 137.3, 137.0, 131.9, 129.3, 129.2, 128.0, 127.7, 127.5, 122.0, 119.9, 39.7, 27.3$ .

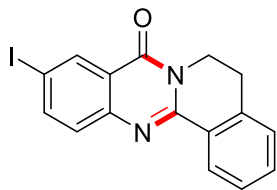

**10-iodo-5,6-dihydro-8H-isoquinolino[1,2-b]quinazolin-8-one (3ha)**

Brown solid. m.p.:188-189 °C.  $^1\text{H}$  NMR (600 MHz,  $\text{CDCl}_3$ )  $\delta$  = 8.61 (s, 1H), 8.43 (d,  $J$  = 7.2 Hz, 1H), 7.97 (d,  $J$  = 8.4 Hz, 1H), 7.47 (d,  $J$  = 7.8 Hz, 2H), 7.42 (t,  $J$  = 7.8 Hz, 1H), 7.27 (d,  $J$  = 6.6 Hz, 1H), 4.38 (t,  $J$  = 6.6 Hz, 2H), 3.09 (t,  $J$  = 6.6 Hz, 2H).  $^{13}\text{C}$  NMR (150 MHz,  $\text{CDCl}_3$ )  $\delta$  = 160.2, 149.9, 146.9, 142.9, 137.0, 135.6, 132.0, 129.3, 129.1, 128.0, 127.6, 127.5, 122.2, 90.8, 39.7, 27.3. HRMS (ESI) calcd for  $\text{C}_{16}\text{H}_{12}\text{IN}_2\text{O}$  ( $\text{M}+\text{H}$ ) $^+$  374.9989, found 374.9996.

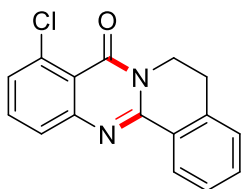

**9-chloro-5,6-dihydro-8H-isoquinolino[1,2-b]quinazolin-8-one (3ia)**<sup>4</sup>

$^1\text{H}$  NMR (600 MHz,  $\text{CDCl}_3$ )  $\delta$  = 8.41 (d,  $J$  = 7.2 Hz, 1H), 7.62 (d,  $J$  = 7.8 Hz, 1H), 7.55 (t,  $J$  = 7.8 Hz, 1H), 7.49-7.36 (m, 3H), 7.24 (d,  $J$  = 6.6 Hz, 1H), 4.33 (d,  $J$  = 6.0 Hz, 2H), 3.07 (s, 2H).  $^{13}\text{C}$  NMR (150 MHz,  $\text{CDCl}_3$ )  $\delta$  = 159.7, 150.0, 149.8, 137.1, 134.0, 133.5, 132.0, 129.1, 128.9, 127.9, 127.54, 127.47, 126.8, 117.8, 39.5, 27.3.

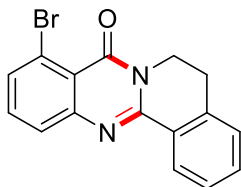

**9-bromo-5,6-dihydro-8H-isoquinolino[1,2-b]quinazolin-8-one (3ja)**

Brown solid. m.p.:223-225 °C.  $^1\text{H}$  NMR (600 MHz,  $\text{CDCl}_3$ )  $\delta$  = 8.44 (d,  $J$  = 7.2 Hz, 1H), 7.71 (d,  $J$  = 7.8 Hz, 1 H), 7.68 (d,  $J$  = 7.8 Hz, 1 H), 7.52-7.45 (m, 2H), 7.42 (t,  $J$  = 7.2 Hz, 1H), 7.27 (d,  $J$  = 6.6 Hz, 1H), 4.36 (t,  $J$  = 6.6 Hz, 2H), 3.09 (t,  $J$  = 6.0 Hz, 2H).  $^{13}\text{C}$  NMR (150 MHz,  $\text{CDCl}_3$ )  $\delta$  = 159.8, 149.9, 149.7, 137.1, 133.8, 132.9, 132.0, 128.9, 127.9, 127.61, 127.57, 127.5, 121.4, 118.7, 39.7, 27.3. HRMS (ESI)  $m/z$  calcd for  $\text{C}_{16}\text{H}_{12}\text{BrN}_2\text{O}$  ( $\text{M}+\text{H}$ ) $^+$  327.0127, found 327.0132.

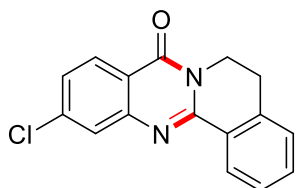

**11-chloro-5,6-dihydro-8H-isoquinolino[1,2-b]quinazolin-8-one (3ka)**<sup>4</sup>

$^1\text{H}$  NMR (600 MHz,  $\text{CDCl}_3$ )  $\delta$  = 8.45 (d,  $J$  = 7.2 Hz, 1H), 8.21 (d,  $J$  = 8.4 Hz, 1H), 7.75

(s, 1H), 7.49 (t,  $J = 7.2$  Hz, 1H), 7.43 (t,  $J = 7.2$  Hz, 1H), 7.39 (d,  $J = 8.4$  Hz, 1H), 7.28 (d,  $J = 7.2$  Hz, 1H), 4.39 (t,  $J = 6.0$  Hz, 2H), 3.10 (t,  $J = 6.0$  Hz, 2H).  $^{13}\text{C}$  NMR (100 MHz,  $\text{CDCl}_3$ )  $\delta = 161.0, 150.5, 148.5, 140.4, 137.1, 132.1, 129.0, 128.3, 128.2, 127.7, 127.5, 127.1, 126.9, 119.1, 39.6, 27.3$ .

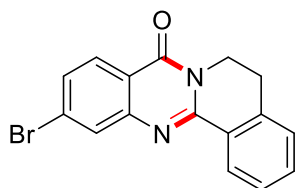

**11-bromo-5,6-dihydro-8H-isoquinolino[1,2-*b*]quinazolin-8-one (3la)<sup>4</sup>**

$^1\text{H}$  NMR (600 MHz,  $\text{CDCl}_3$ )  $\delta = 8.42$  (d,  $J = 7.8$  Hz, 1H), 8.12 (d,  $J = 8.4$  Hz, 1H), 7.92 (s, 1H), 7.52 (d,  $J = 8.4$  Hz, 1H), 7.47 (t,  $J = 7.2$  Hz, 1H), 7.42 (t,  $J = 7.8$  Hz, 1H), 7.27 (d,  $J = 6.6$  Hz, 1H), 4.37 (t,  $J = 6.6$  Hz, 2H), 3.09 (t,  $J = 6.6$  Hz, 2H).  $^{13}\text{C}$  NMR (150 MHz,  $\text{CDCl}_3$ )  $\delta = 161.1, 150.4, 148.7, 137.0, 132.0, 130.1, 129.7, 129.1, 128.8, 128.3, 128.1, 127.6, 127.5, 119.4, 39.5, 27.2$ .

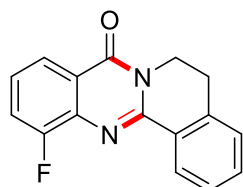

**12-fluoro-5,6-dihydro-8H-isoquinolino[1,2-*b*]quinazolin-8-one (3ma)<sup>3</sup>**

$^1\text{H}$  NMR (600 MHz,  $\text{CDCl}_3$ )  $\delta = 8.50$  (d,  $J = 7.8$  Hz, 1H), 8.05 (d,  $J = 7.8$  Hz, 1H), 7.51–7.33 (m, 4H), 7.25 (d,  $J = 7.2$  Hz, 1H), 4.40 (t,  $J = 6.6$  Hz, 2H), 3.10 (t,  $J = 6.0$  Hz, 2H).  $^{13}\text{C}$  NMR (100 MHz,  $\text{CDCl}_3$ )  $\delta = 160.8, 160.7, 158.4, 155.9, 149.8, 137.4, 137.3, 136.9, 132.0, 129.2, 128.3, 127.7, 127.4, 126.33, 126.25, 122.5, 122.30, 122.26, 119.5, 119.3, 39.7, 27.2$ .

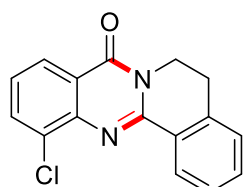

**12-chloro-5,6-dihydro-8H-isoquinolino[1,2-*b*]quinazolin-8-one (3na)<sup>4</sup>**

$^1\text{H}$  NMR (600 MHz,  $\text{CDCl}_3$ )  $\delta = 8.56$  (d,  $J = 7.2$  Hz, 1H), 8.19 (d,  $J = 7.2$  Hz, 1H), 7.80 (d,  $J = 7.2$  Hz, 1H), 7.51–7.40 (m, 2H), 7.34 (t,  $J = 7.8$  Hz, 1H), 7.24 (d,  $J = 6.6$  Hz, 1H), 4.40 (t,  $J = 6.6$  Hz, 2H), 3.10 (t,  $J = 6.6$  Hz, 2H).  $^{13}\text{C}$  NMR (150 MHz,  $\text{CDCl}_3$ )  $\delta = 161.1, 149.8, 144.4, 136.9, 134.4, 132.02, 131.99, 129.2, 128.4, 127.7, 127.4, 126.3, 125.6, 122.1, 39.7, 27.2$ .

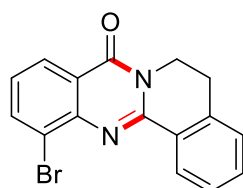

**12-bromo-5,6-dihydro-8H-isoquinolino[1,2-*b*]quinazolin-8-one (3oa)**

Brown solid. m.p.:233-235 °C.  $^1\text{H}$  NMR (600 MHz,  $\text{CDCl}_3$ )  $\delta$  = 8.58 (d,  $J$  = 6.6 Hz, 1H), 8.24 (d,  $J$  = 7.2 Hz, 1H), 8.01 (d,  $J$  = 7.2 Hz, 1H), 7.45 (t,  $J$  = 7.2 Hz, 2H), 7.33–7.22 (m, 2H), 4.40 (t,  $J$  = 6.6 Hz, 2H), 3.10 (t,  $J$  = 6.0 Hz, 2H).  $^{13}\text{C}$  NMR (150 MHz,  $\text{CDCl}_3$ )  $\delta$  = 161.2, 149.9, 145.4, 137.8, 136.9, 132.1, 129.2, 128.5, 127.8, 127.4, 126.8, 126.4, 122.8, 122.1, 39.7, 27.2. HRMS (ESI)  $m/z$  calcd for  $\text{C}_{16}\text{H}_{12}\text{BrN}_2\text{O}$  ( $\text{M}+\text{H}$ ) $^+$  327.0127, found 327.0136.

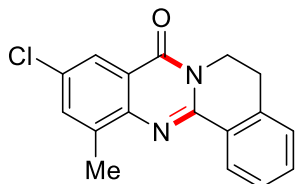

**10-chloro-12-methyl-5,6-dihydro-8H-isoquinolino[1,2-*b*]quinazolin-8-one**

**(3pa)**

Brown solid. m.p.:195-197 °C.  $^1\text{H}$  NMR (600 MHz,  $\text{CDCl}_3$ )  $\delta$  = 8.47 (d,  $J$  = 7.2 Hz, 1H), 8.07 (s, 1H), 7.51 (s, 1H), 7.46 (t,  $J$  = 6.6 Hz, 1H), 7.42 (t,  $J$  = 7.2 Hz, 1H), 7.26 (d,  $J$  = 6.6 Hz, 1H), 4.37 (t,  $J$  = 6.0 Hz, 2H), 3.08 (t,  $J$  = 6.0 Hz, 2H), 2.65 (s, 3H).  $^{13}\text{C}$  NMR (150 MHz,  $\text{CDCl}_3$ )  $\delta$  = 161.0, 148.2, 144.8, 138.3, 136.8, 134.7, 131.7, 131.5, 129.5, 128.0, 127.53, 127.47, 123.7, 121.5, 39.6, 27.2, 17.1. HRMS (ESI) calcd for  $\text{C}_{17}\text{H}_{14}\text{ClN}_2\text{O}$  ( $\text{M}+\text{H}$ ) $^+$  297.0789, found 297.0796.

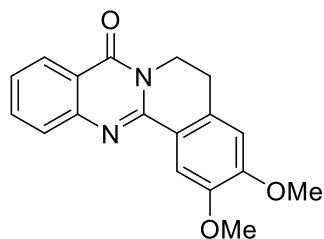

**2,3-dimethoxy-5,6-dihydro-8H-isoquinolino[1,2-*b*]quinazolin-8-one (3ab)**<sup>3</sup>

$^1\text{H}$  NMR (400 MHz,  $\text{CDCl}_3$ )  $\delta$  = 8.27 (d,  $J$  = 8.0 Hz, 1H), 7.95 (s, 1H), 7.79–7.67 (m, 2H), 7.41 (t,  $J$  = 7.2 Hz, 1H), 6.70 (s, 1H), 4.39 (t,  $J$  = 6.4 Hz, 2H), 4.03 (s, 3H), 3.95 (s, 3H), 3.02 (t,  $J$  = 6.4 Hz, 2H).  $^{13}\text{C}$  NMR (100 MHz,  $\text{CDCl}_3$ )  $\delta$  = 161.7, 152.1, 149.2, 148.4, 147.7, 134.0, 130.8, 127.1, 126.8, 126.0, 121.6, 120.3, 109.8, 109.5, 56.1, 56.0, 39.6, 26.9.

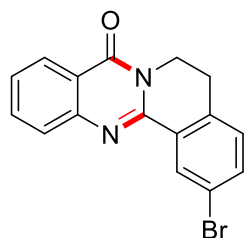

**2-bromo-5,6-dihydro-8H-isoquinolino[1,2-*b*]quinazolin-8-one (3ac)**<sup>5</sup>

$^1\text{H}$  NMR (400 MHz,  $\text{CDCl}_3$ )  $\delta$  = 8.64 (s, 1H), 8.30 (d,  $J$  = 7.6 Hz, 1H), 7.86–7.73 (m, 2H), 7.59 (d,  $J$  = 7.2 Hz, 1H), 7.48 (t,  $J$  = 6.4 Hz, 1H), 7.18 (t,  $J$  = 8.0 Hz, 1H), 4.40 (t,  $J$  = 6.4 Hz, 2H), 3.06 (t,  $J$  = 6.4 Hz, 2H).  $^{13}\text{C}$  NMR (150 MHz,  $\text{CDCl}_3$ )  $\delta$  = 161.4, 147.9,



147.4, 135.7, 134.4, 134.3, 131.3, 130.6, 129.1, 127.6, 126.84, 126.80, 121.3, 120.7, 39.3, 26.9.

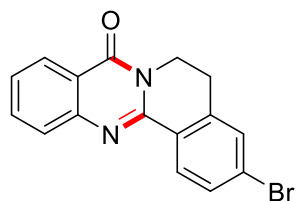

**3-bromo-5,6-dihydro-8H-isoquinolino[1,2-b]quinazolin-8-one (3ad)<sup>2</sup>**

<sup>1</sup>H NMR (400 MHz, CDCl<sub>3</sub>)  $\delta$  = 8.30 (d,  $J$  = 8.4 Hz, 1H), 8.23 (d,  $J$  = 7.6 Hz, 1H), 7.74–7.64 (m, 2H), 7.49 (d,  $J$  = 8.0 Hz, 1H), 7.44–7.35 (m, 2H), 4.33 (t,  $J$  = 6.4 Hz, 2H), 3.01 (t,  $J$  = 6.4 Hz, 2H). <sup>13</sup>C NMR (150 MHz, CDCl<sub>3</sub>)  $\delta$  = 161.4, 148.5, 147.5, 138.7, 134.3, 130.8, 130.4, 129.6, 128.4, 127.5, 126.8, 126.7, 126.3, 120.7, 39.3, 27.1.

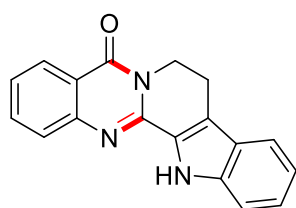

**Rutecarpine (4aa)<sup>2</sup>**

<sup>1</sup>H NMR (400 MHz, CDCl<sub>3</sub>)  $\delta$  = 9.67 (s, 1H), 8.32 (d,  $J$  = 8.0 Hz, 1H), 7.73–7.66 (m, 2H), 7.63 (d,  $J$  = 8.0 Hz, 1H), 7.48–7.36 (m, 2H), 7.31 (t,  $J$  = 7.6 Hz, 1H), 7.17 (t,  $J$  = 7.6 Hz, 1H), 4.59 (t,  $J$  = 6.8 Hz, 2H), 3.24 (t,  $J$  = 7.2 Hz, 2H). <sup>13</sup>C NMR (150 MHz, CDCl<sub>3</sub>)  $\delta$  = 161.5, 147.2, 145.2, 138.4, 134.4, 127.2, 126.9, 126.3, 126.2, 125.6, 125.5, 121.0, 120.5, 120.0, 118.6, 112.2, 41.1, 19.6.

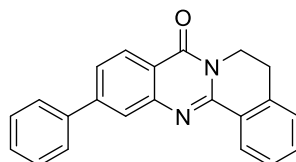

**11-phenyl-5,6-dihydro-8H-isoquinolino[1,2-b]quinazolin-8-one (5a)**

white solid. m.p.:200-202 °C. <sup>1</sup>H NMR (400 MHz, CDCl<sub>3</sub>)  $\delta$  = 8.47 (d,  $J$  = 8.8 Hz, 1H), 8.32 (d,  $J$  = 8.0 Hz, 1H), 7.94 (s, 1H), 7.72–7.61 (m, 3H), 7.48–7.37 (m, 5H), 7.24 (d,  $J$  = 7.6 Hz, 1H), 4.37 (t,  $J$  = 6.8 Hz, 2H), 3.06 (t,  $J$  = 6.4 Hz, 2H). <sup>13</sup>C NMR (100 MHz, CDCl<sub>3</sub>)  $\delta$  = 161.4, 149.6, 148.0, 146.8, 139.6, 136.9, 131.6, 129.4, 128.8, 128.2, 127.9, 127.5, 127.4, 127.3, 127.2, 125.5, 125.4, 119.3, 39.4, 27.3. HRMS (ESI) calcd for C<sub>22</sub>H<sub>17</sub>N<sub>2</sub>O (M+H)<sup>+</sup> 325.1321, found 325.1325.

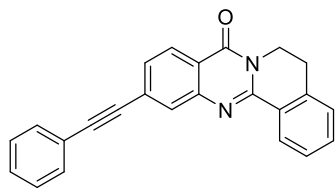

**11-(phenylethynyl)-5,6-dihydro-8H-isoquinolino[1,2-b]quinazolin-8-one (5b)**

white solid. m.p.:187-188 °C. <sup>1</sup>H NMR (400 MHz, CDCl<sub>3</sub>) δ = 8.46 (d, *J* = 8.4 Hz, 1H), 8.24 (d, *J* = 8.0 Hz, 1H), 7.89 (s, 1H), 7.60-7.50 (m, 3H), 7.47-7.39 (m, 2H), 7.38-7.31 (m, 3H), 7.25 (d, *J* = 8.4 Hz, 1H), 4.37 (t, *J* = 6.4 Hz, 2H), 3.06 (t, *J* = 6.4 Hz, 2H). <sup>13</sup>C NMR (100 MHz, CDCl<sub>3</sub>) δ = 161.2, 149.8, 147.6, 136.9, 131.8, 131.7, 130.4, 129.3, 129.1, 128.7, 128.3, 128.0, 127.5, 127.4, 126.8, 122.5, 120.0, 92.4, 88.5, 39.5, 27.3. HRMS (ESI) calcd for C<sub>24</sub>H<sub>17</sub>N<sub>2</sub>O (M+H)<sup>+</sup> 349.1321, found 349.1325.

**4. Reference:**

1. H. L. Cui, L. Jiang, H. Tan and S. Liu, *Adv. Synth. Catal.*, 2019, **361**, 4772-4780.
1. L. Xie, C. Lu, D. Jing, X. Ou and K. Zheng, *Eur. J. Org. Chem.*, 2019, 3649-3653.
2. F. Xie, Q. H. Chen, R. Xie, H. F. Jiang and M. Zhang, *ACS Catal.*, 2018, **8**, 5869-5874.
3. C. Lu, Z. Su, D. Jing, S. Jin, L. Xie, L. Li and K. Zheng, *Org. Lett.*, 2019, **21**, 1438-1443.
4. B. A. Granger, K. Kaneda and S. F. Martin, *Org. Lett.*, 2011, **13**, 4542-4545.

## 5. Spectral copies of $^1\text{H}$ NMR, and $^{13}\text{C}$ NMR

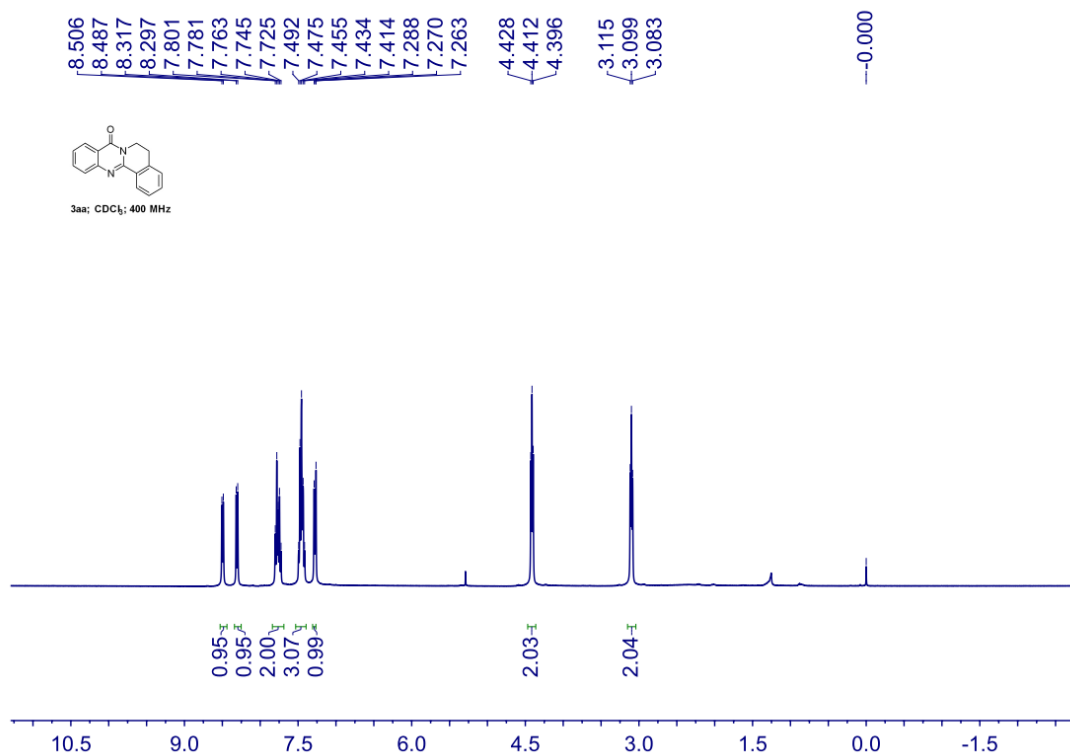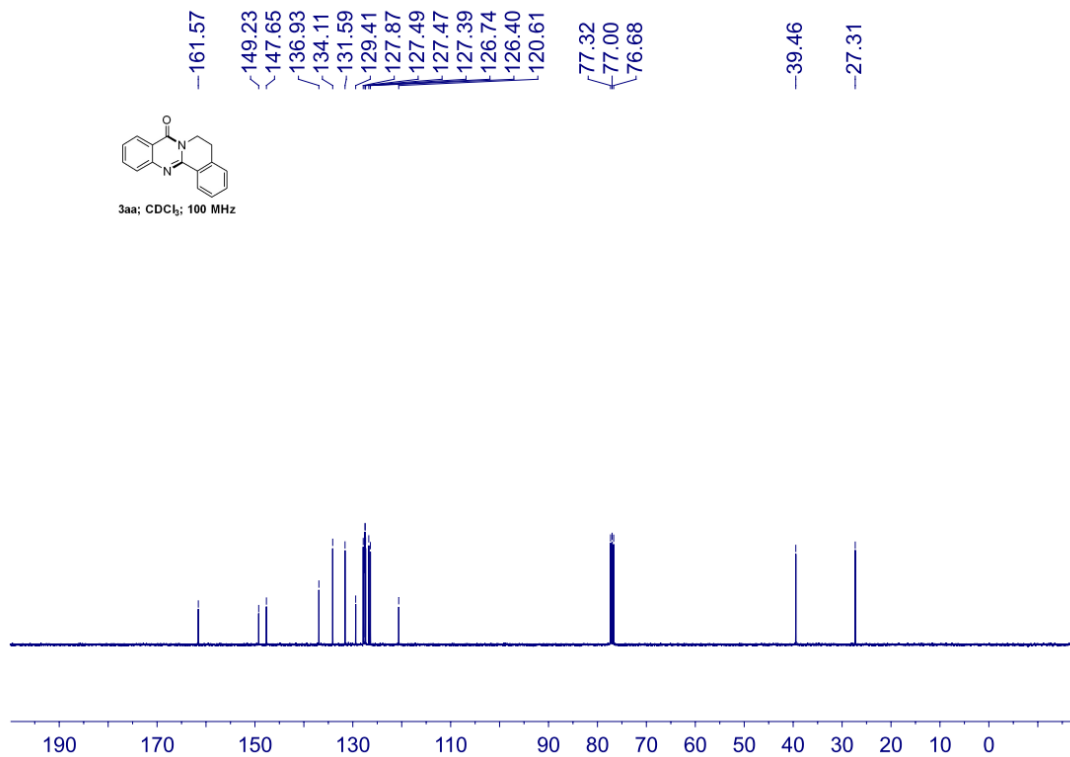

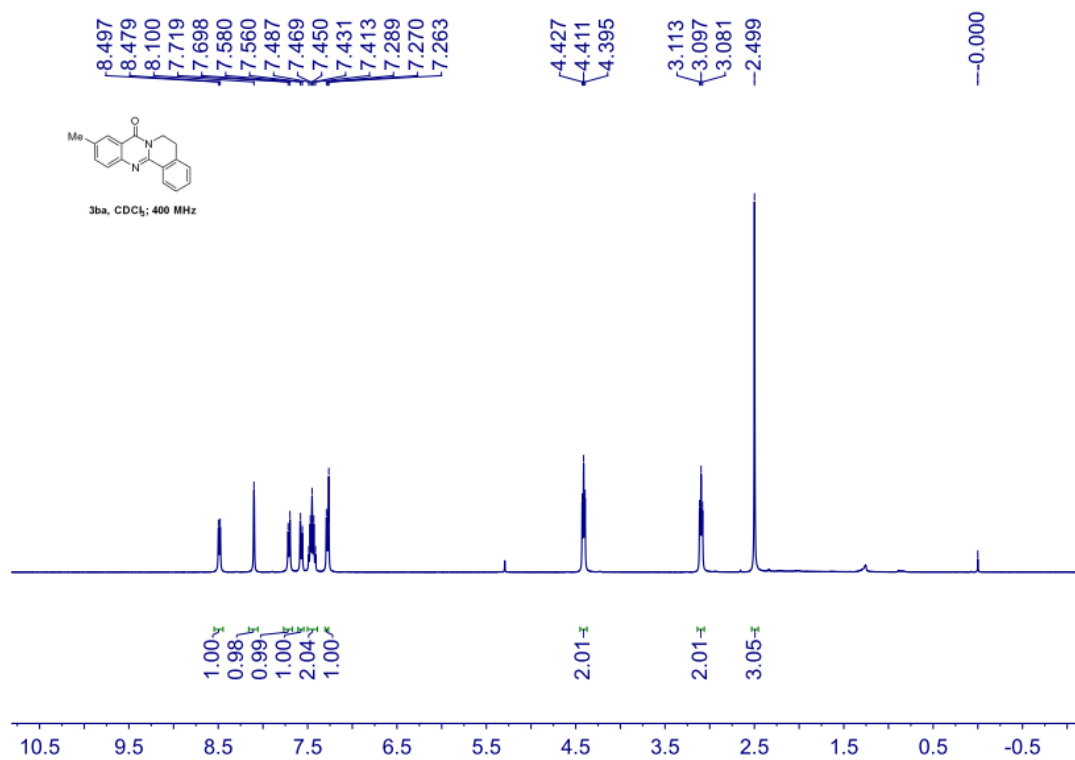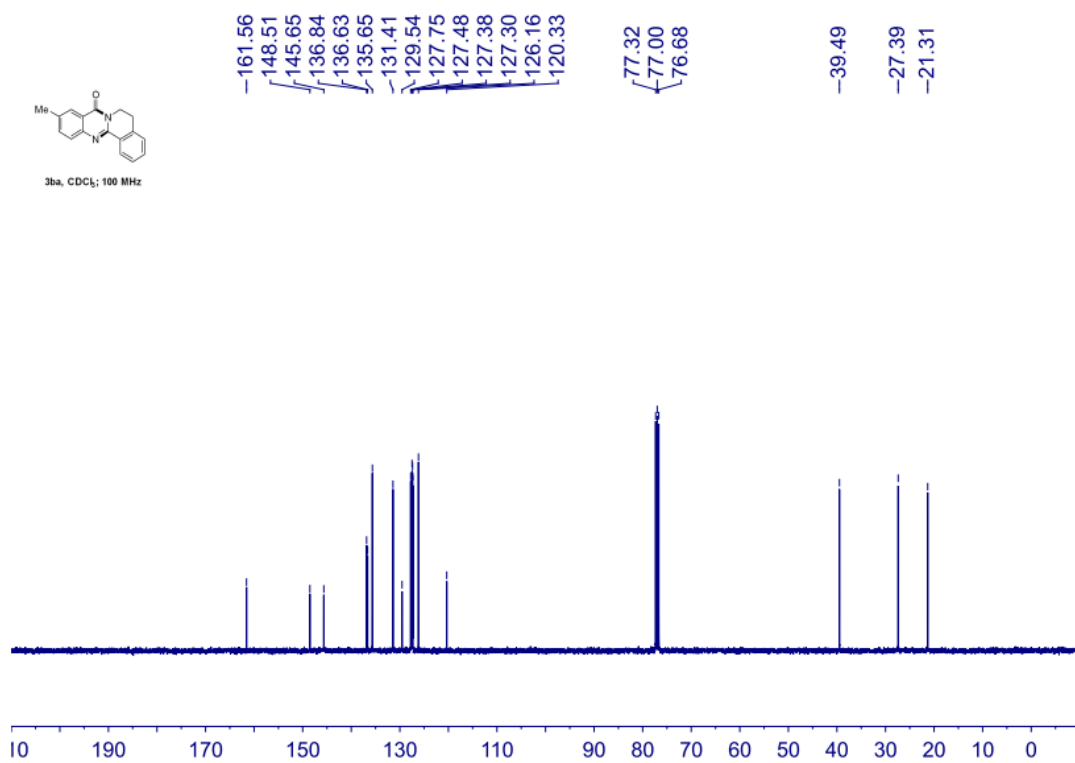

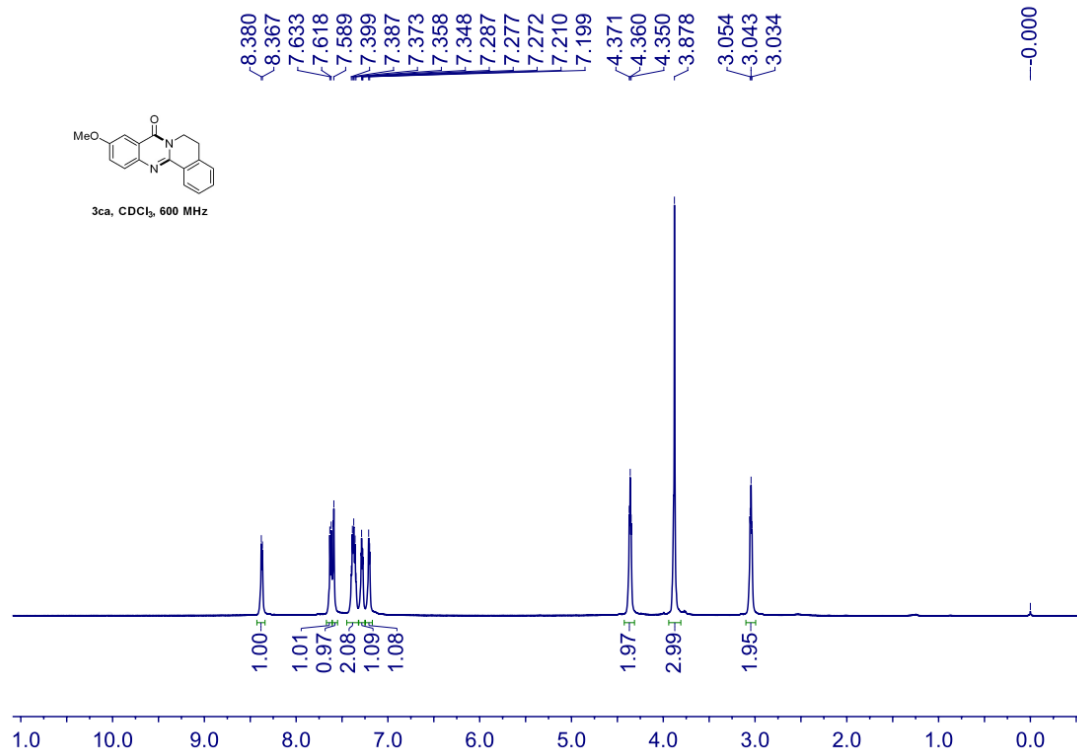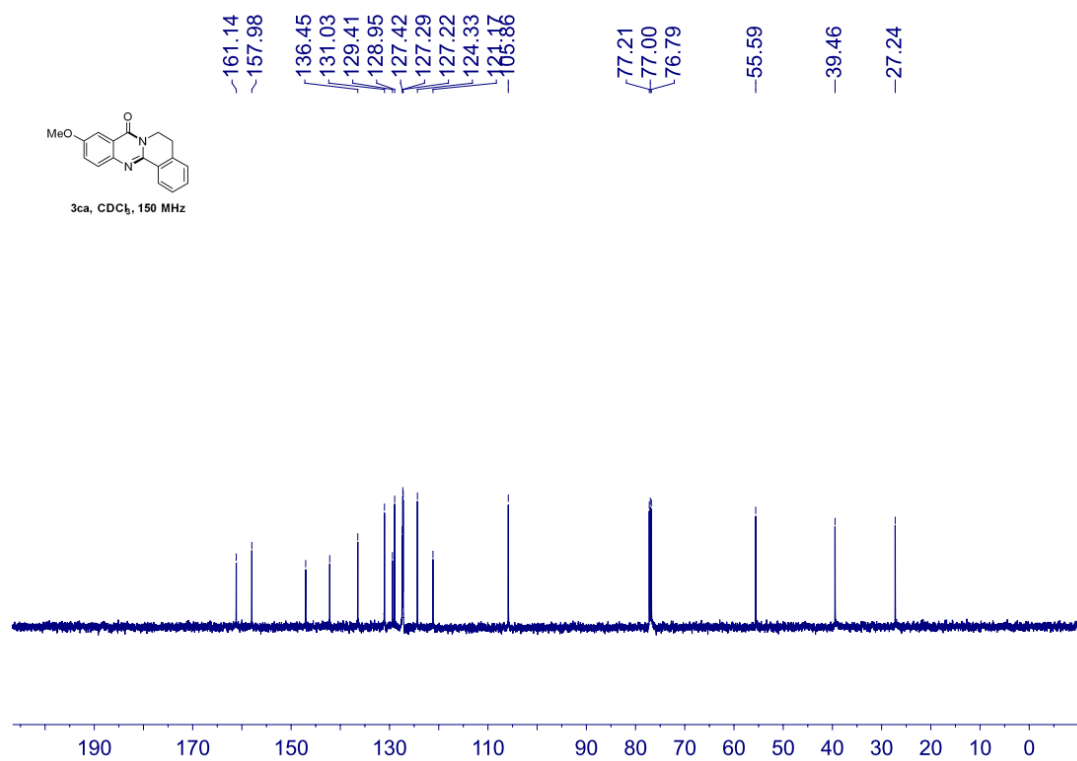

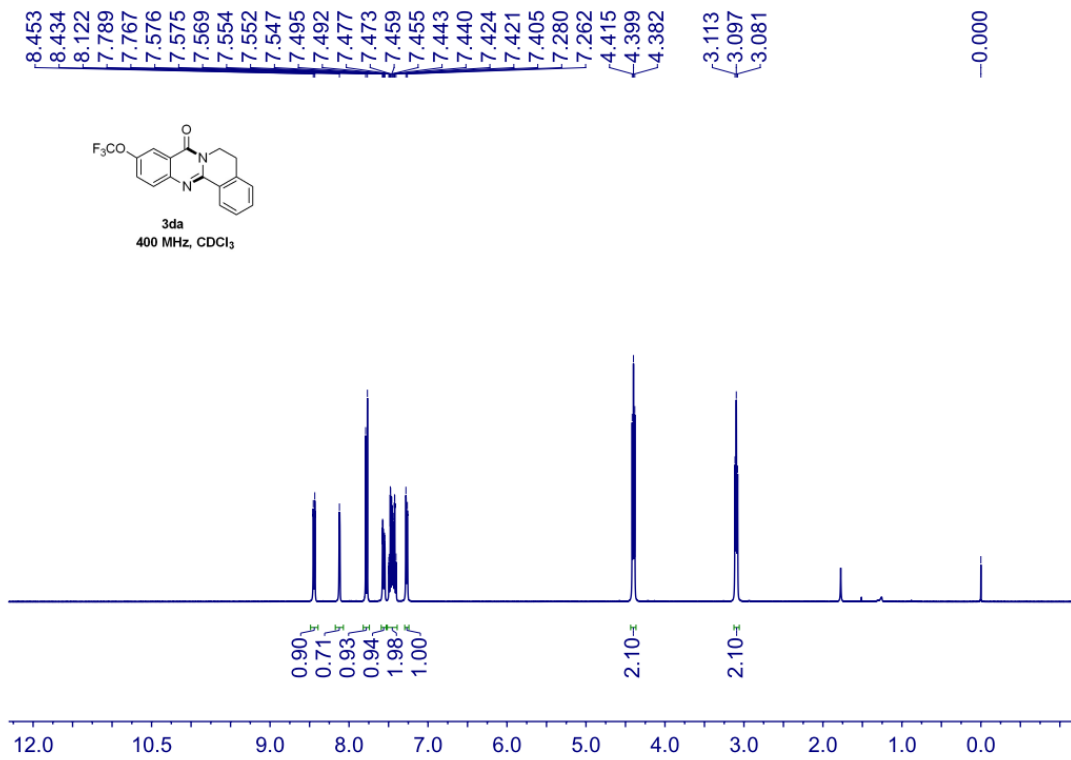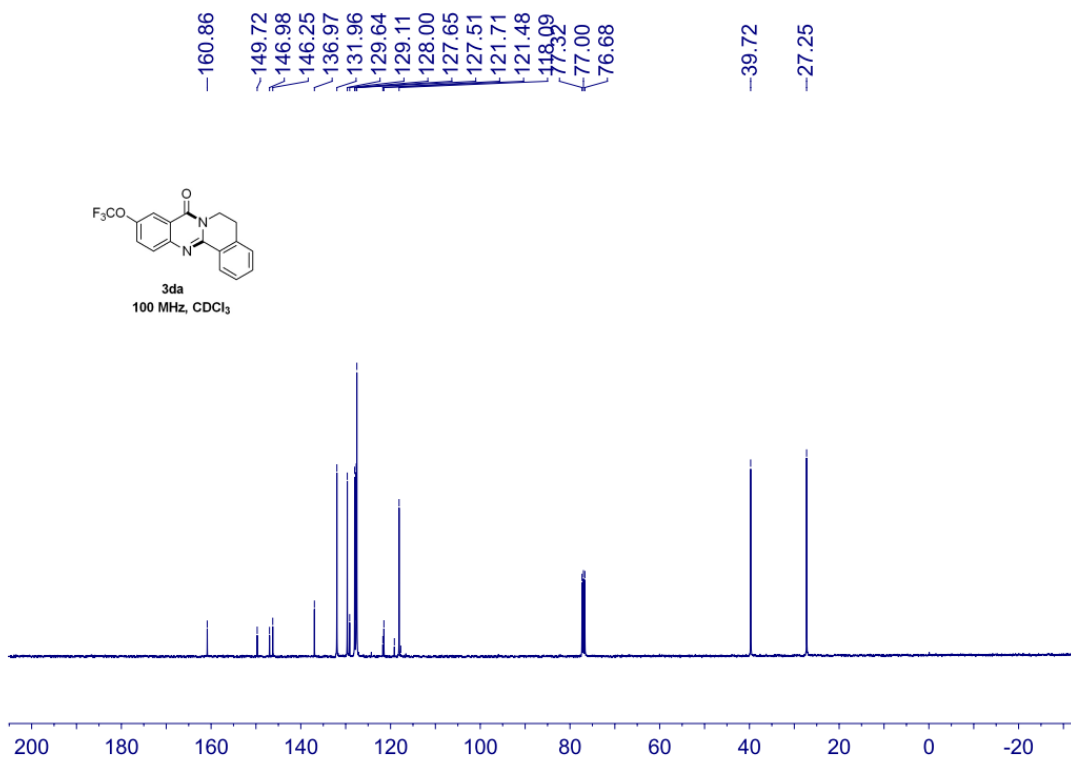

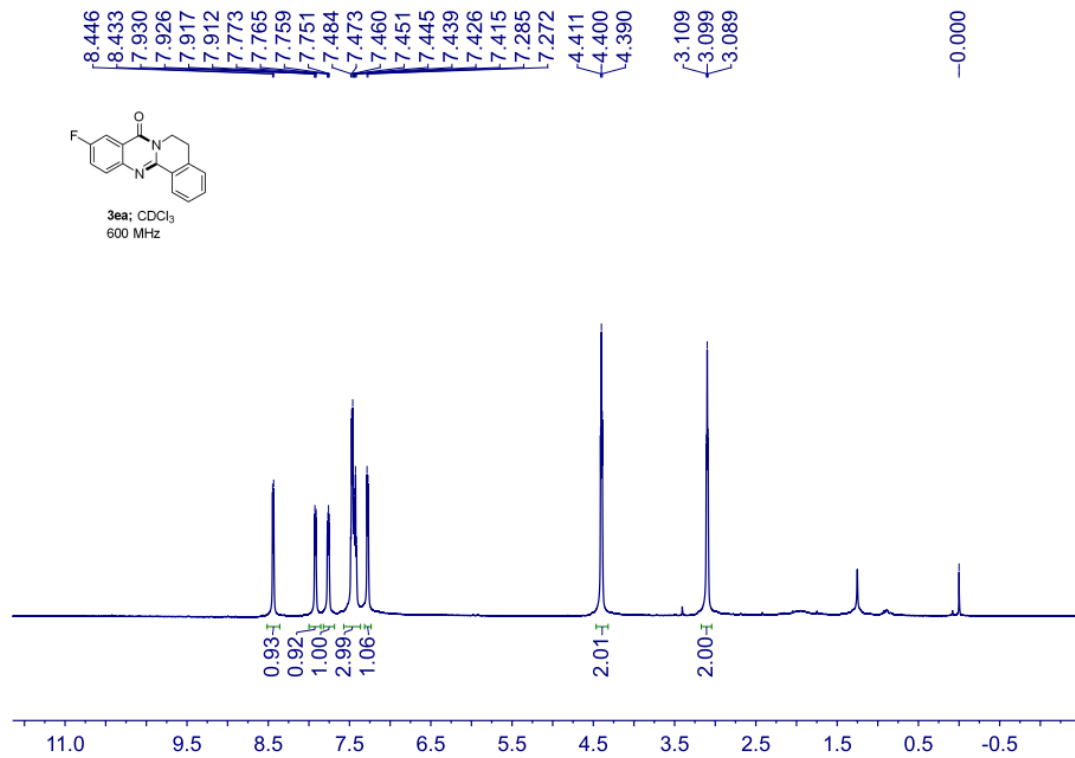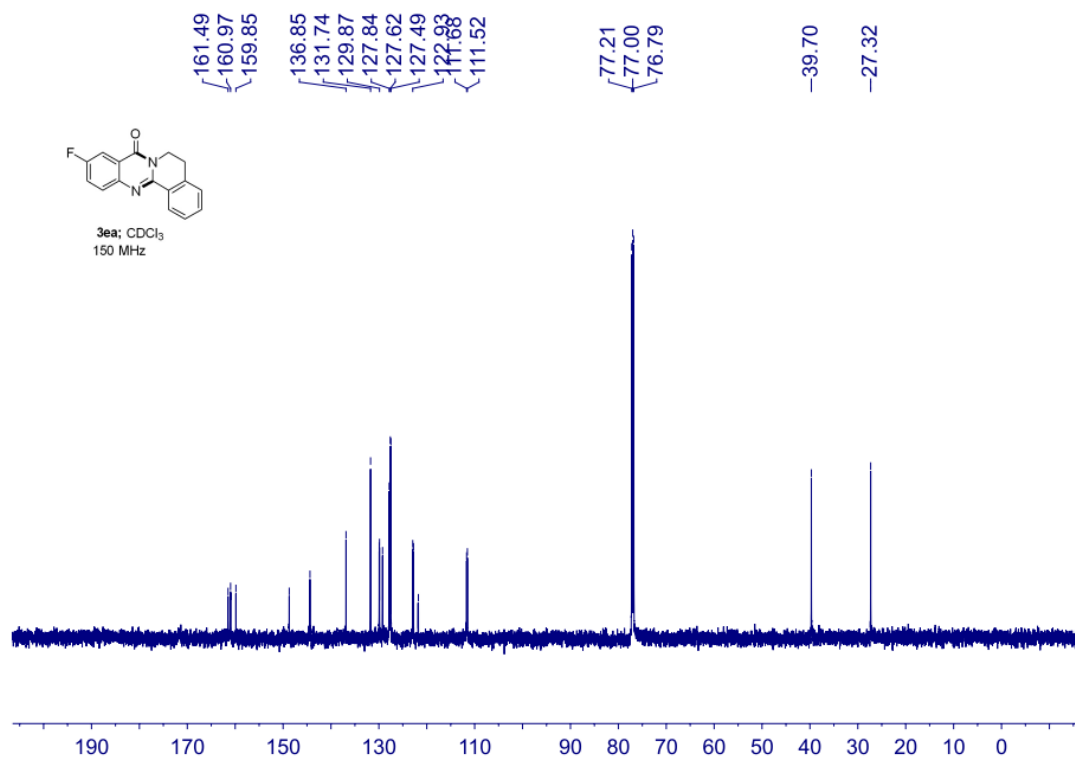

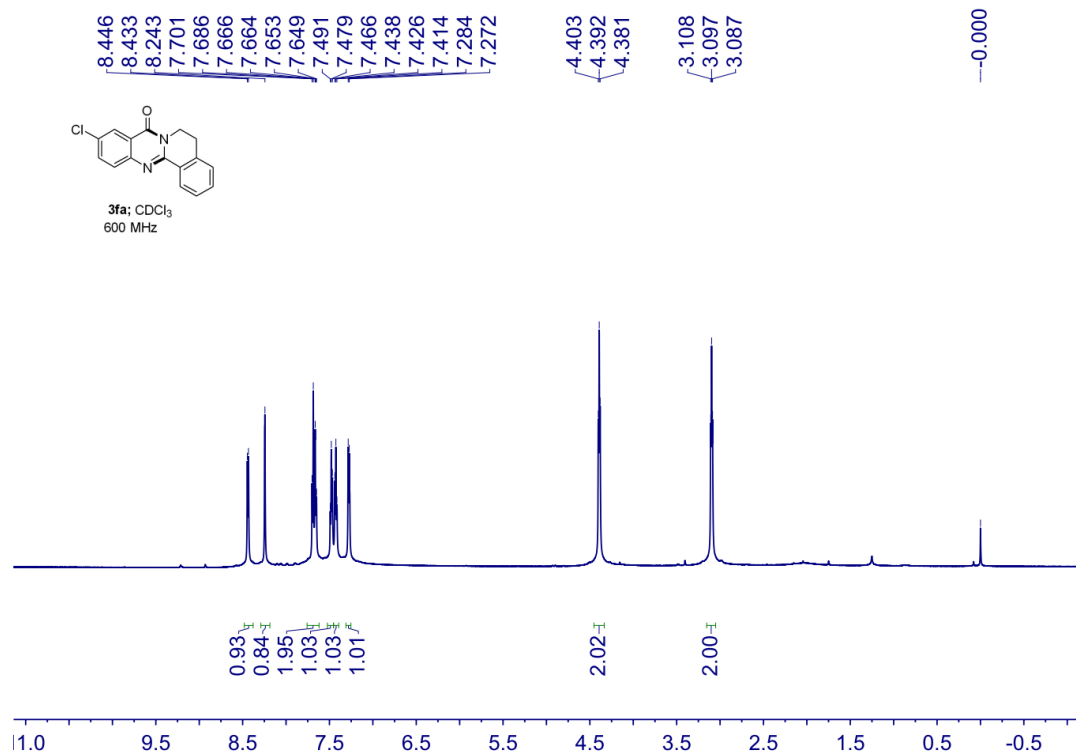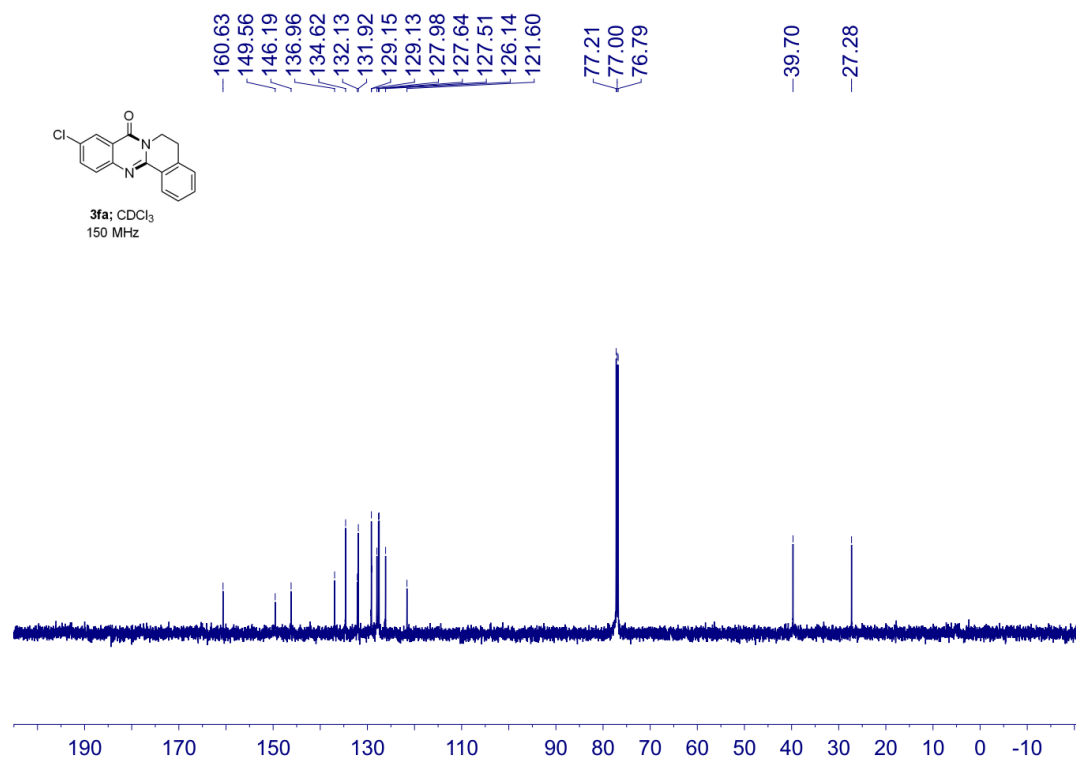



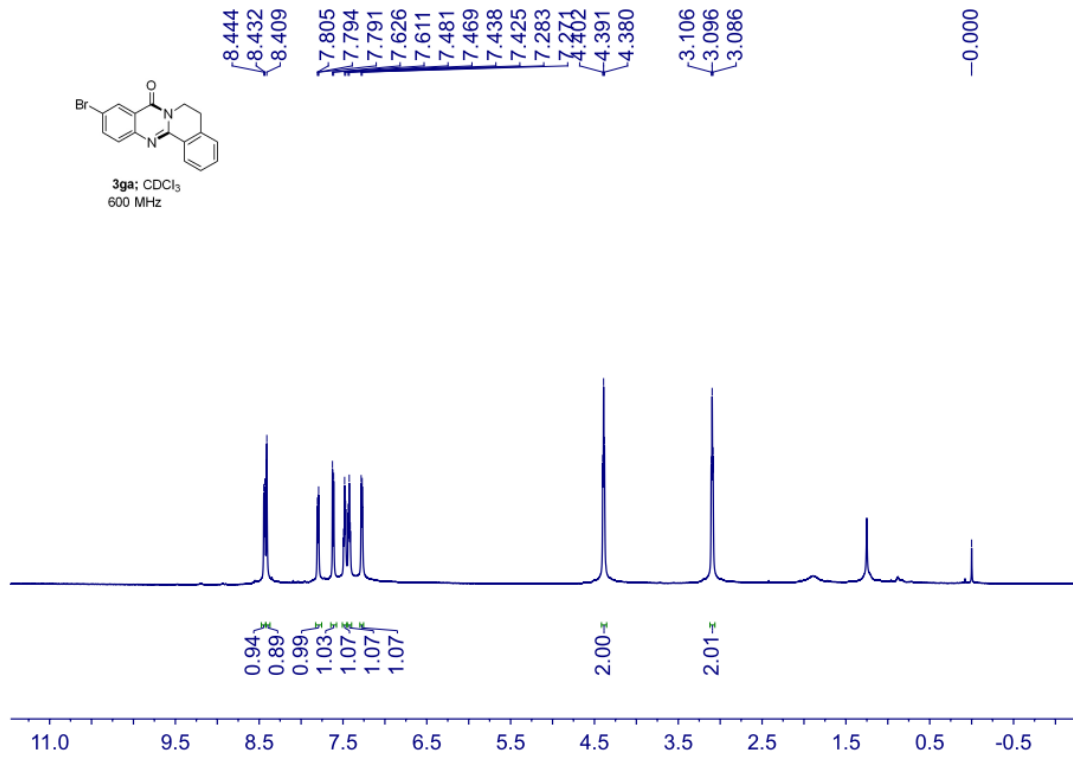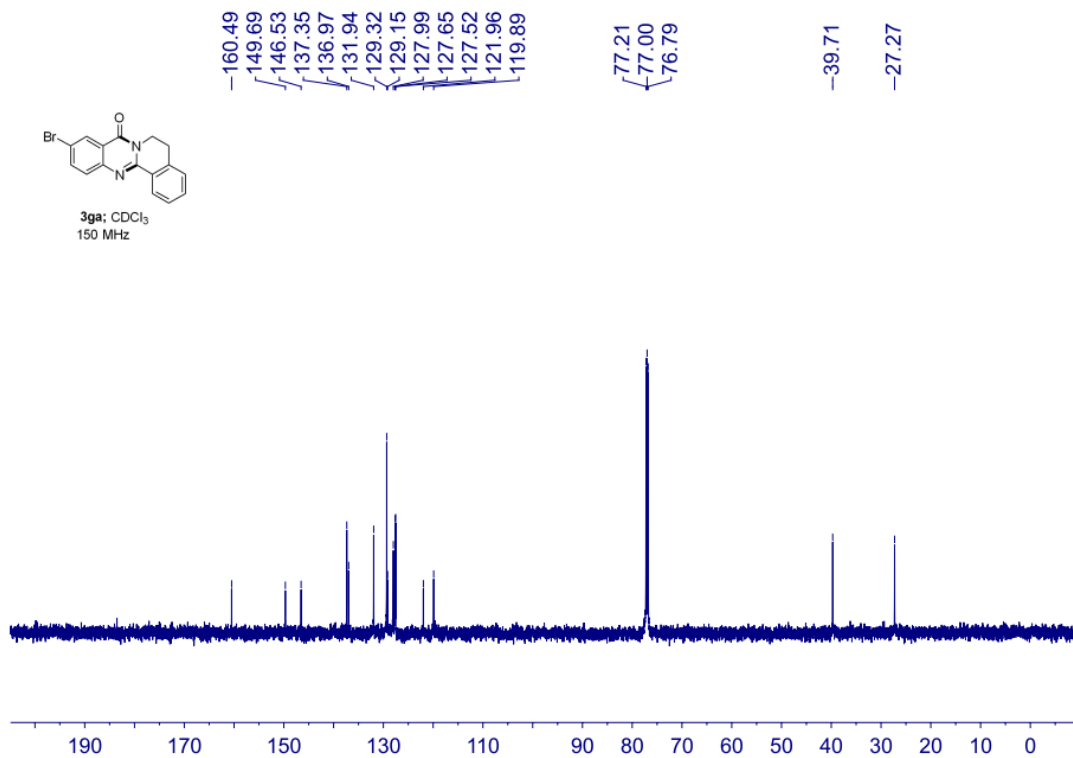

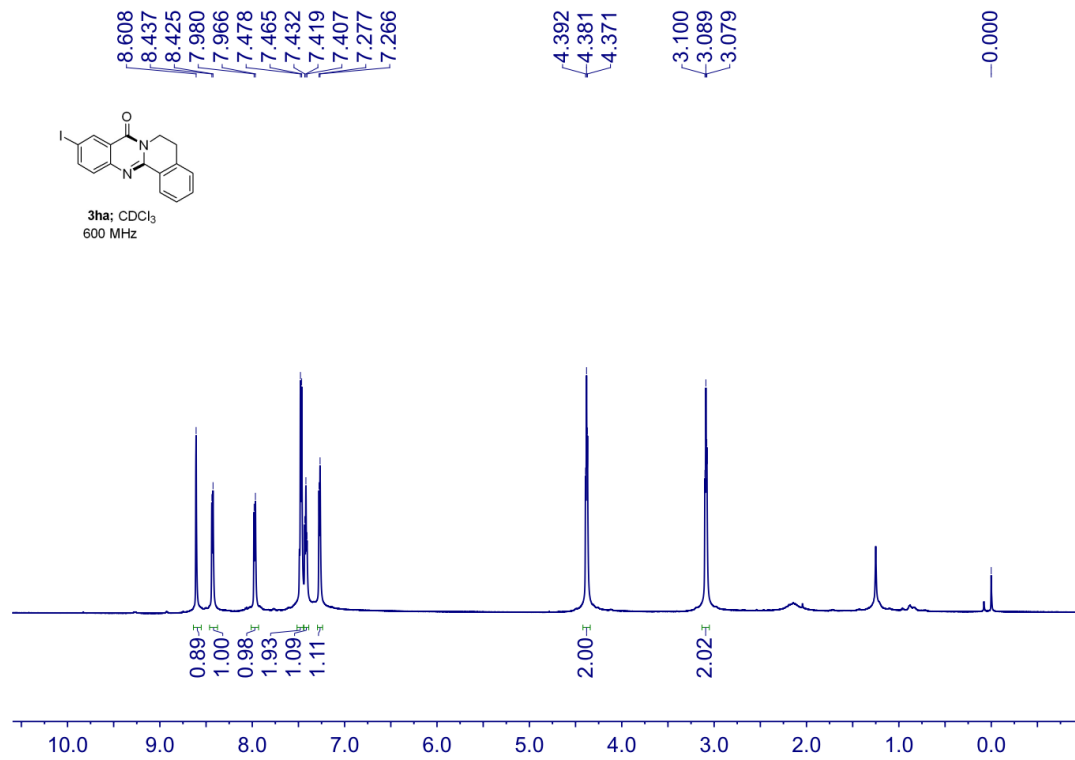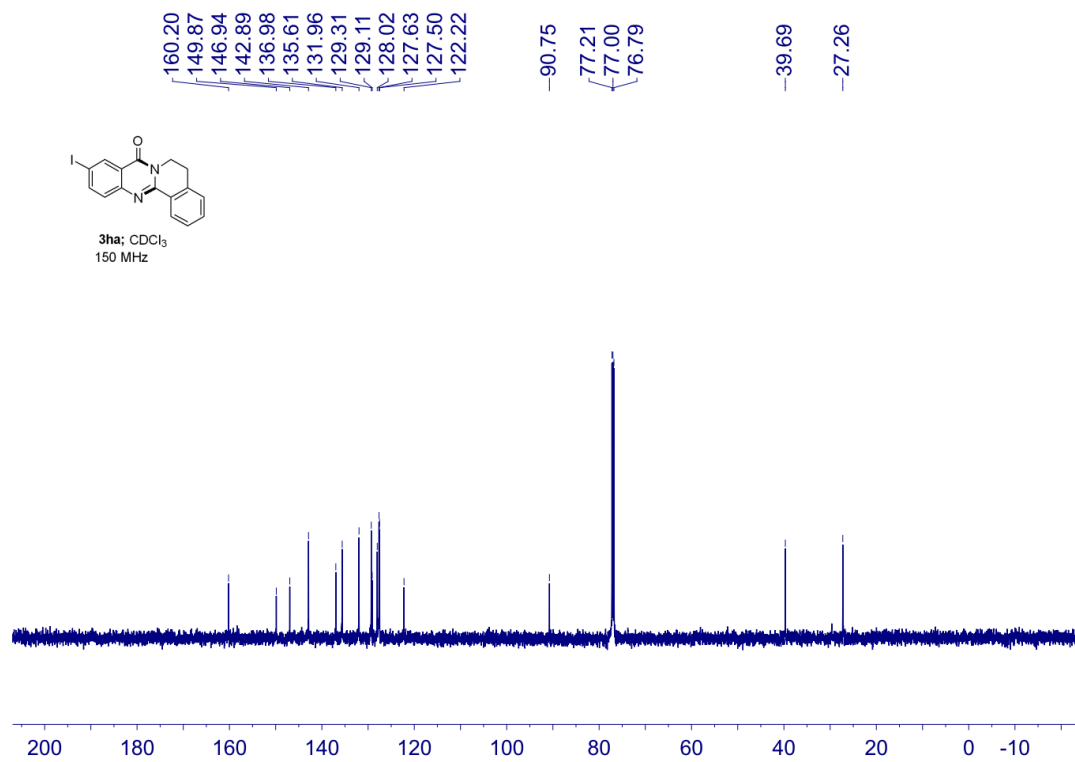

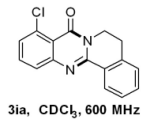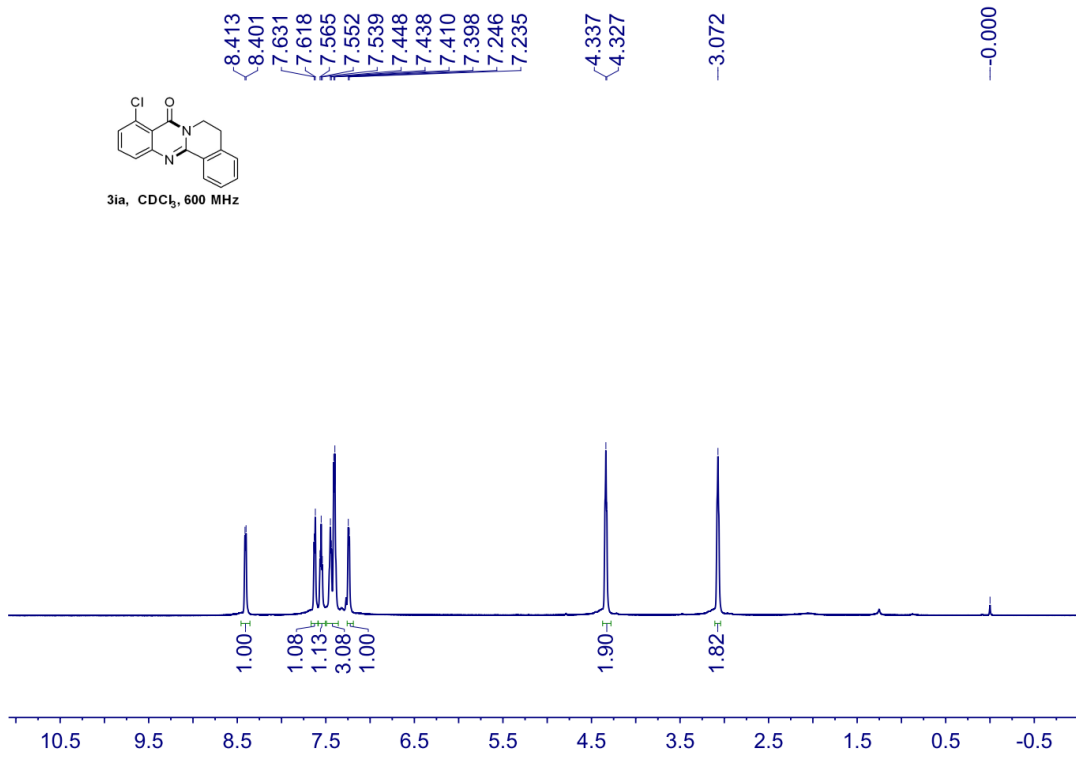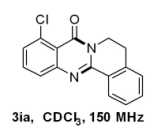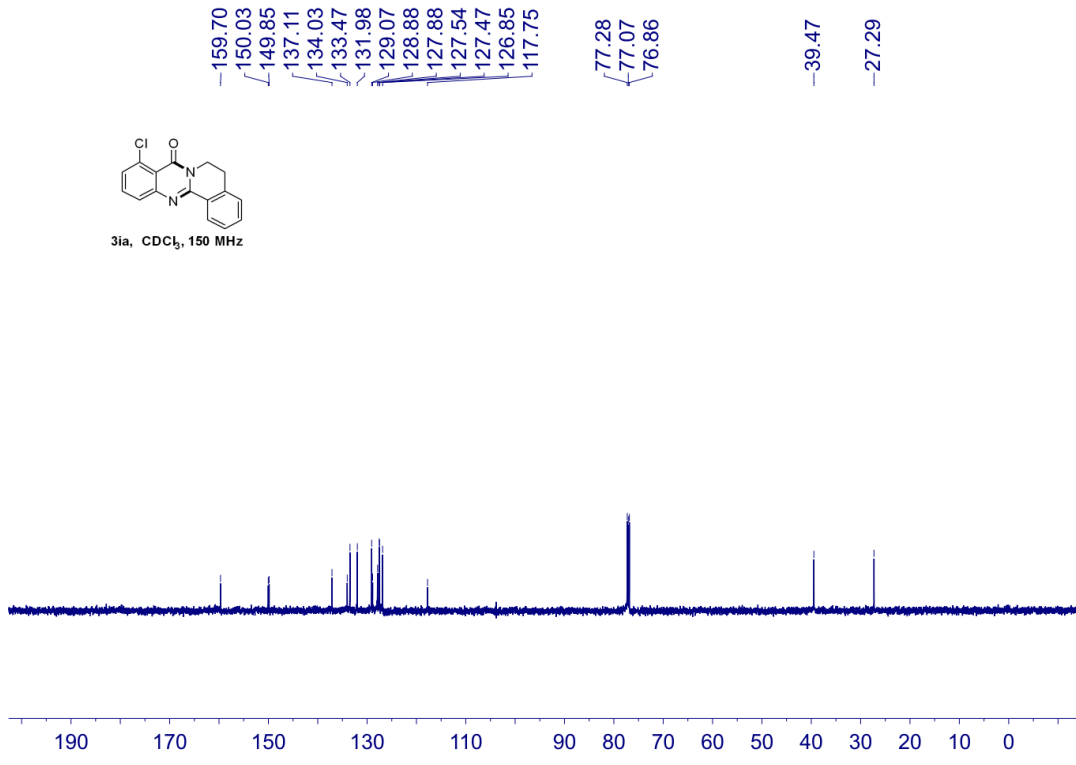

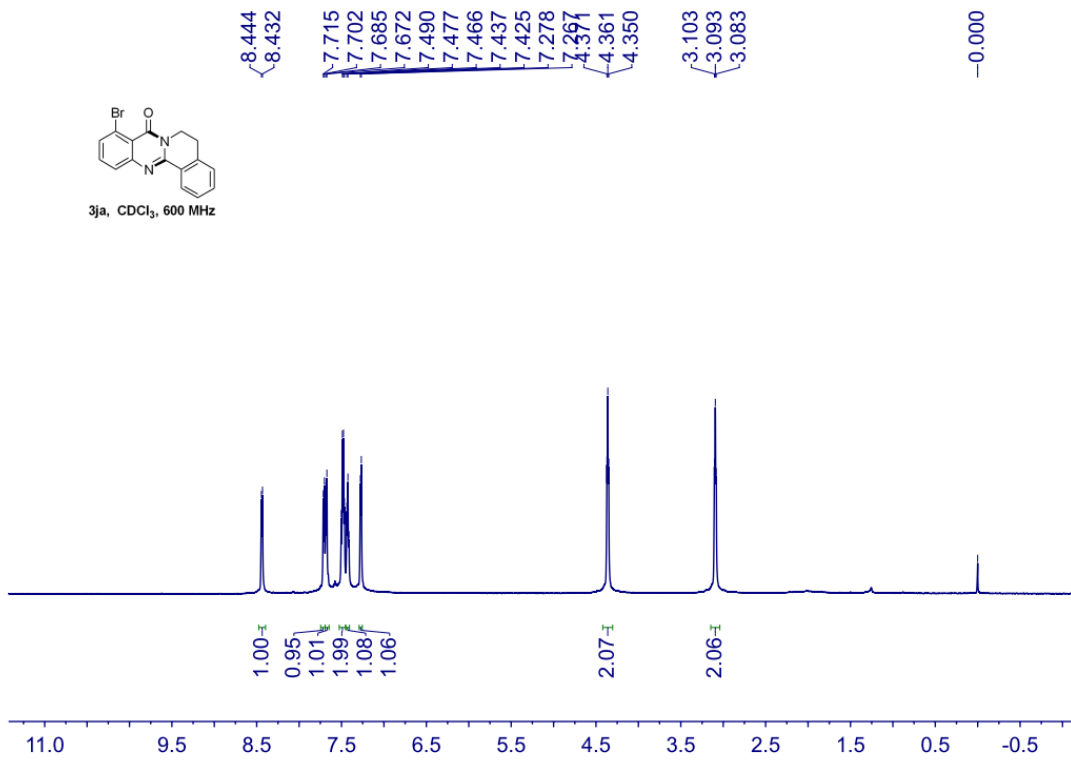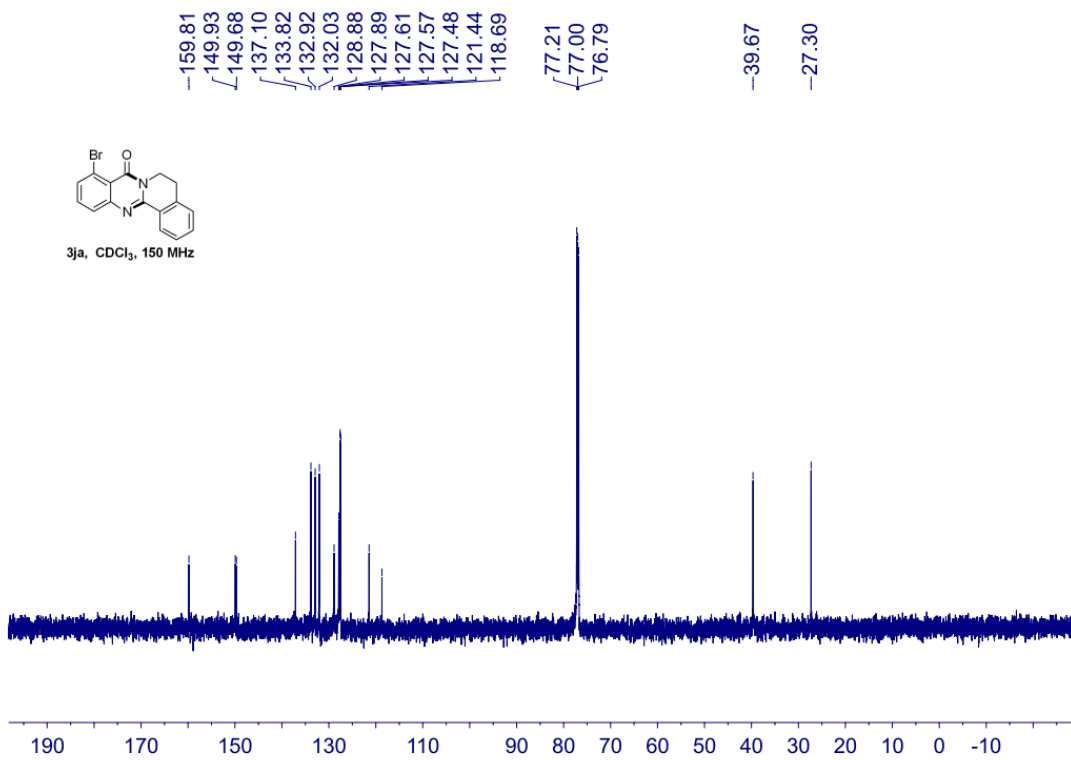

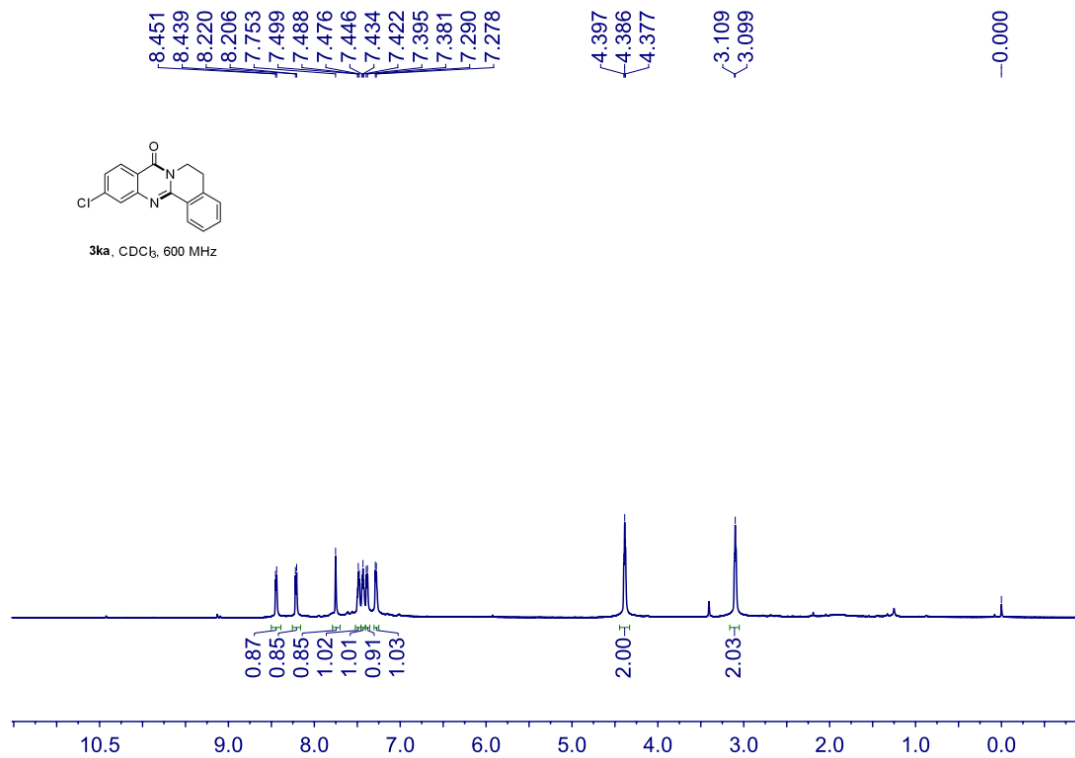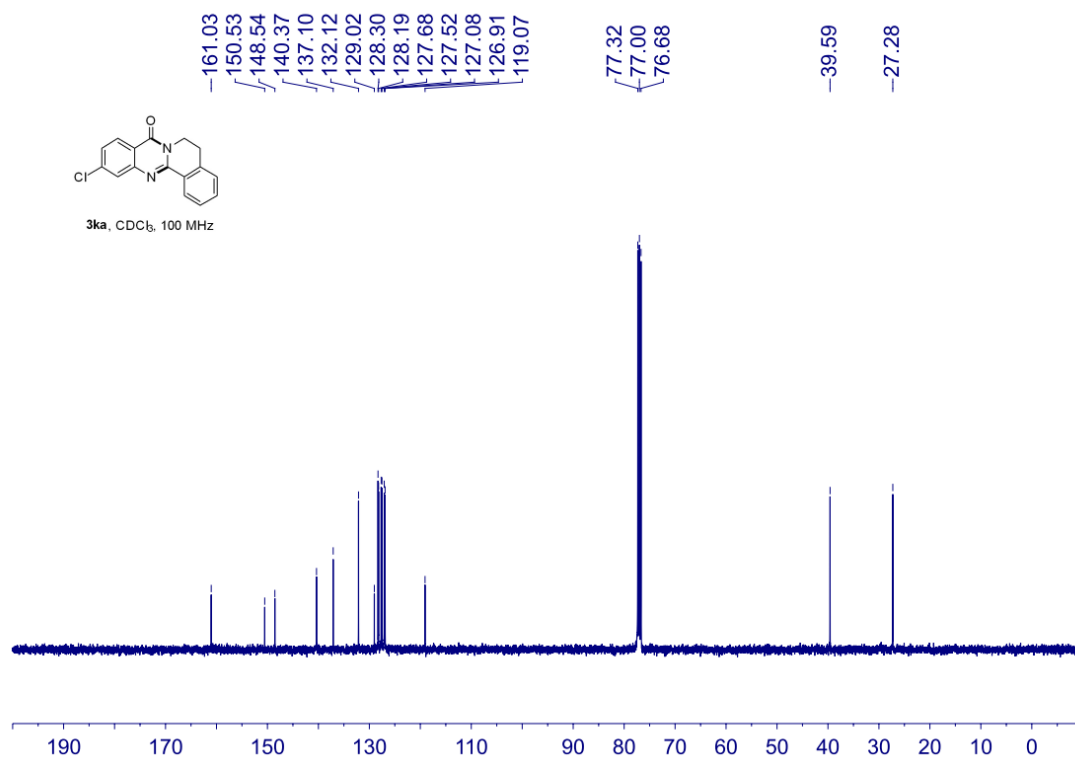

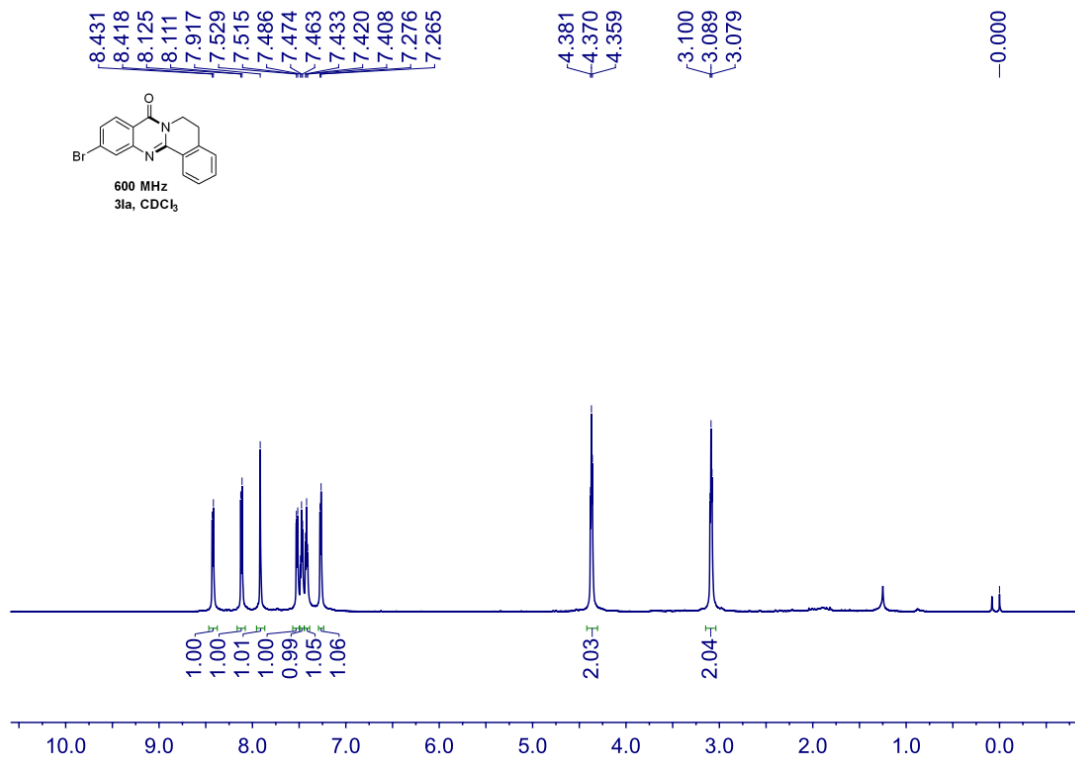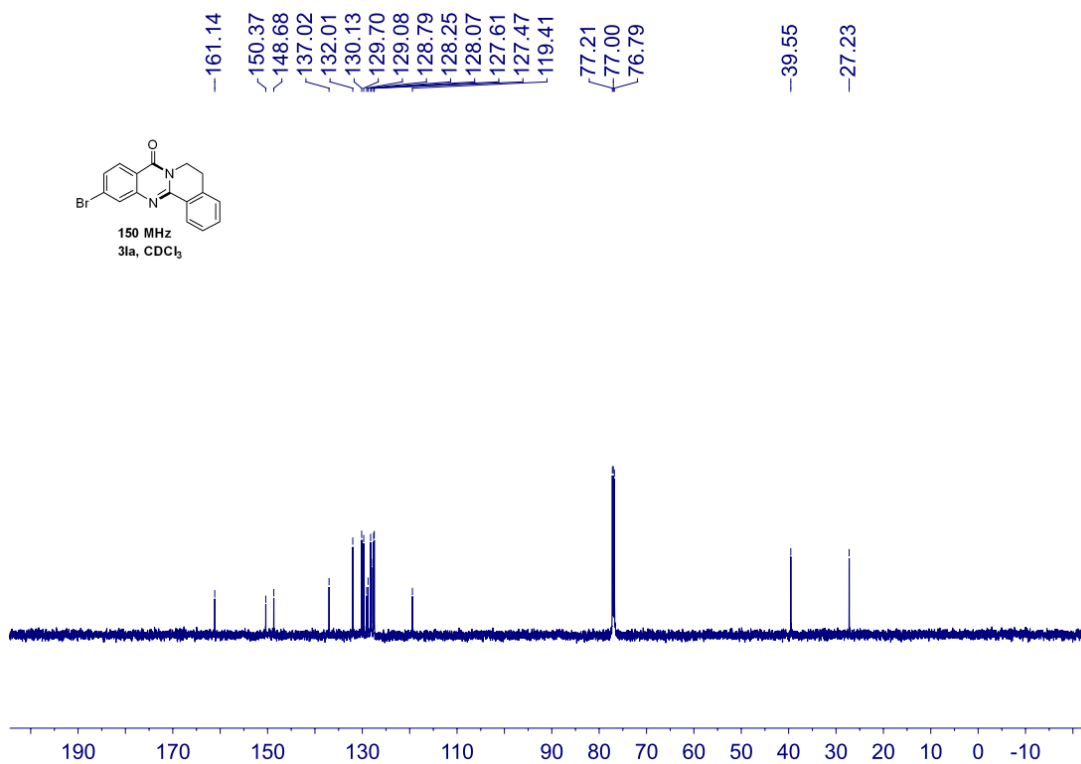

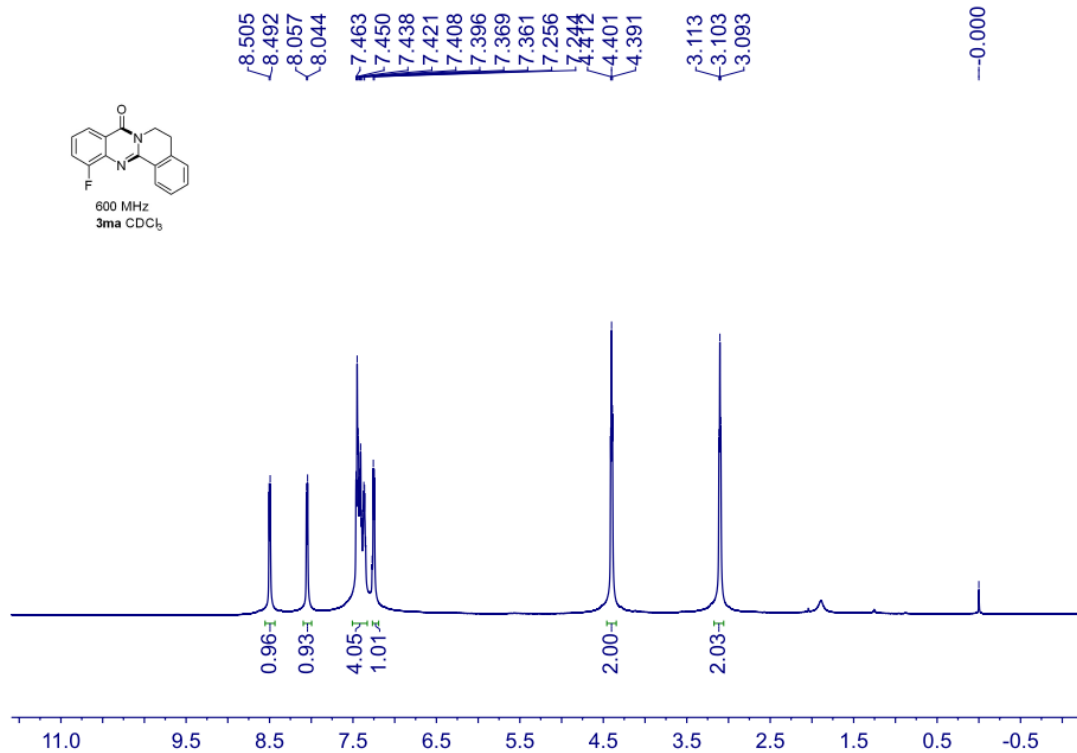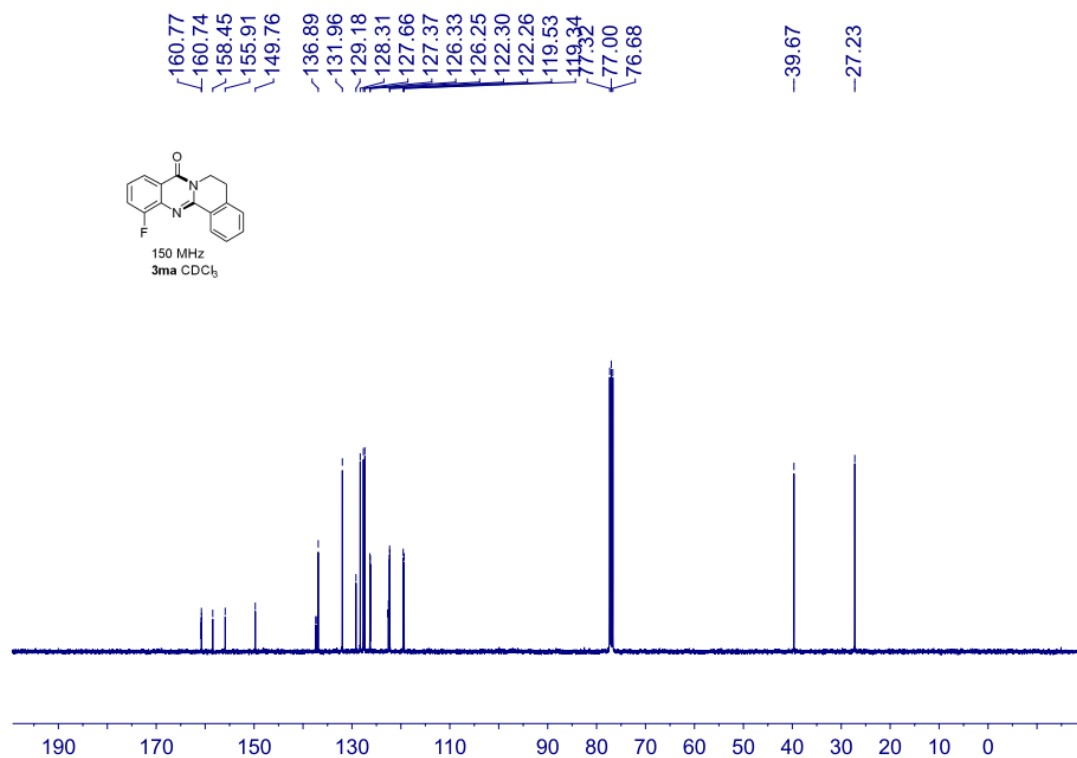

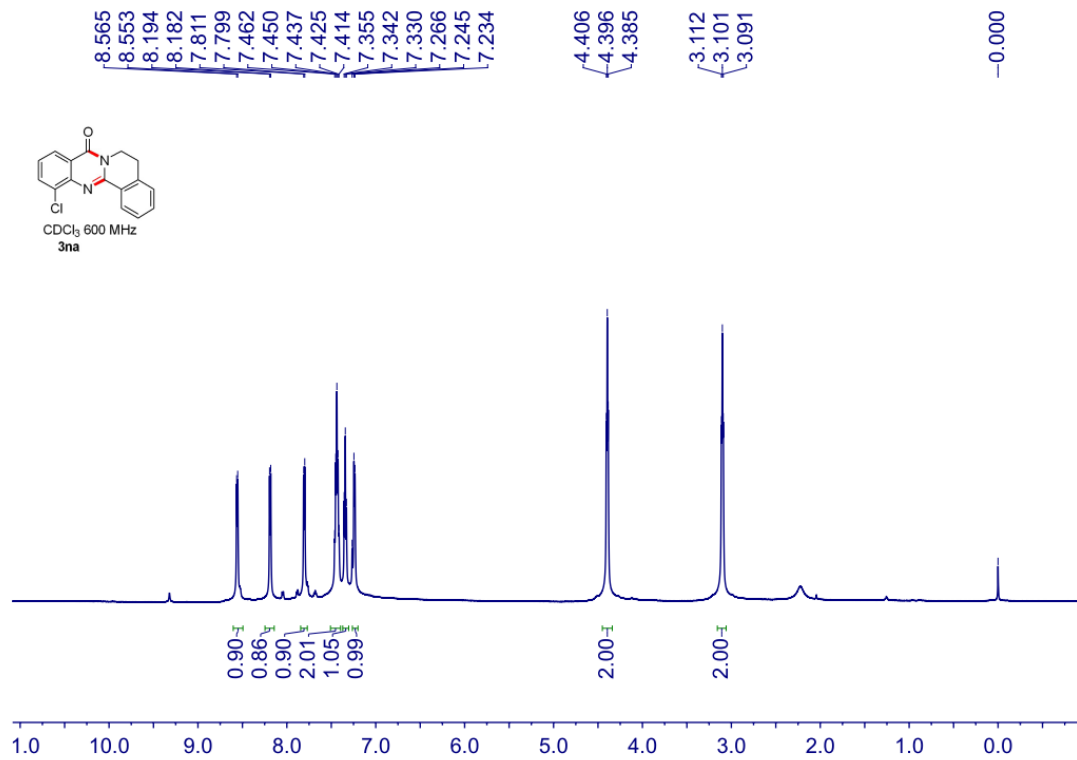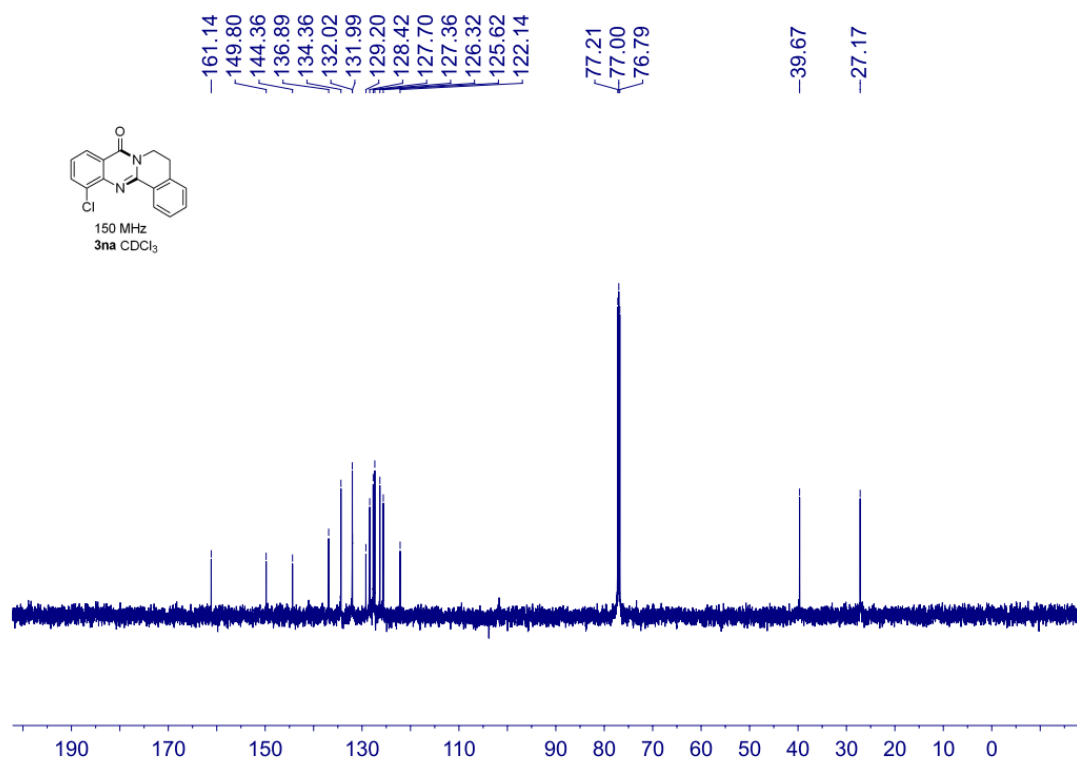



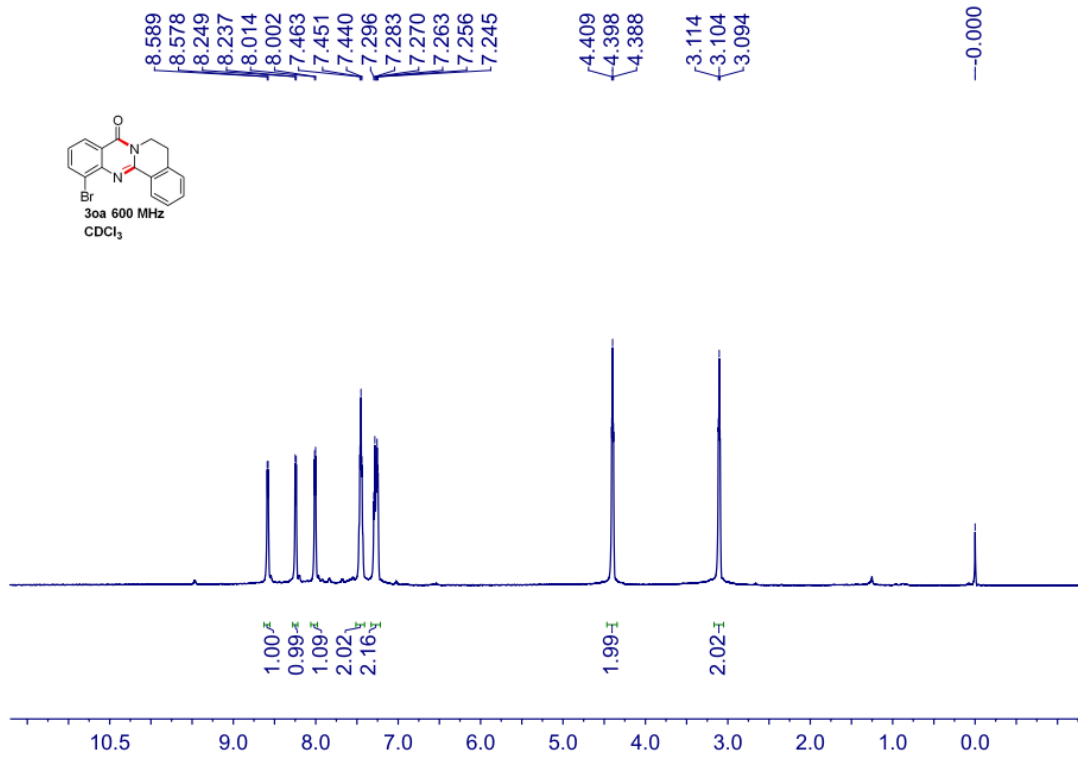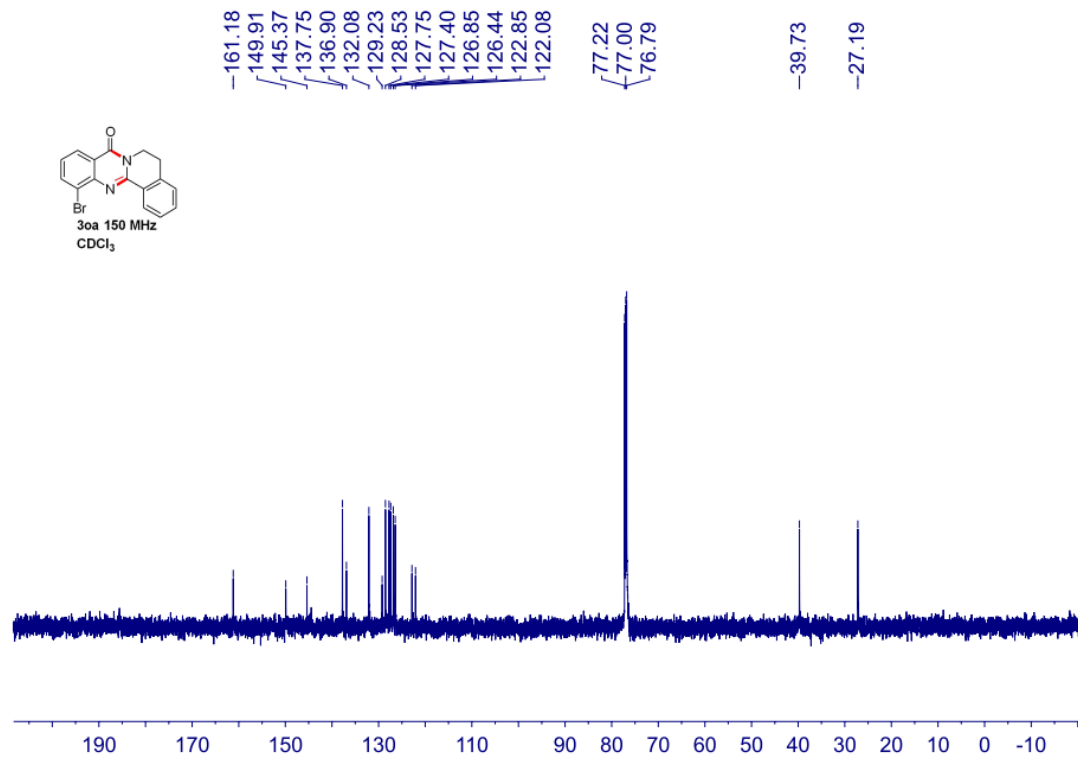

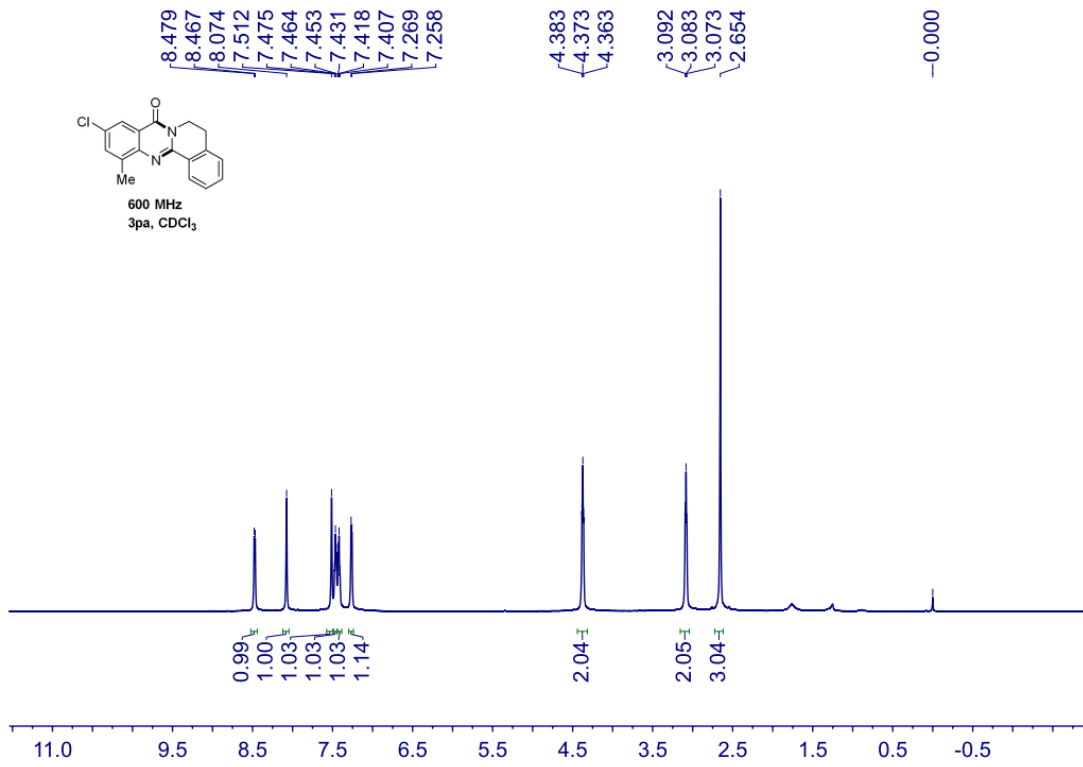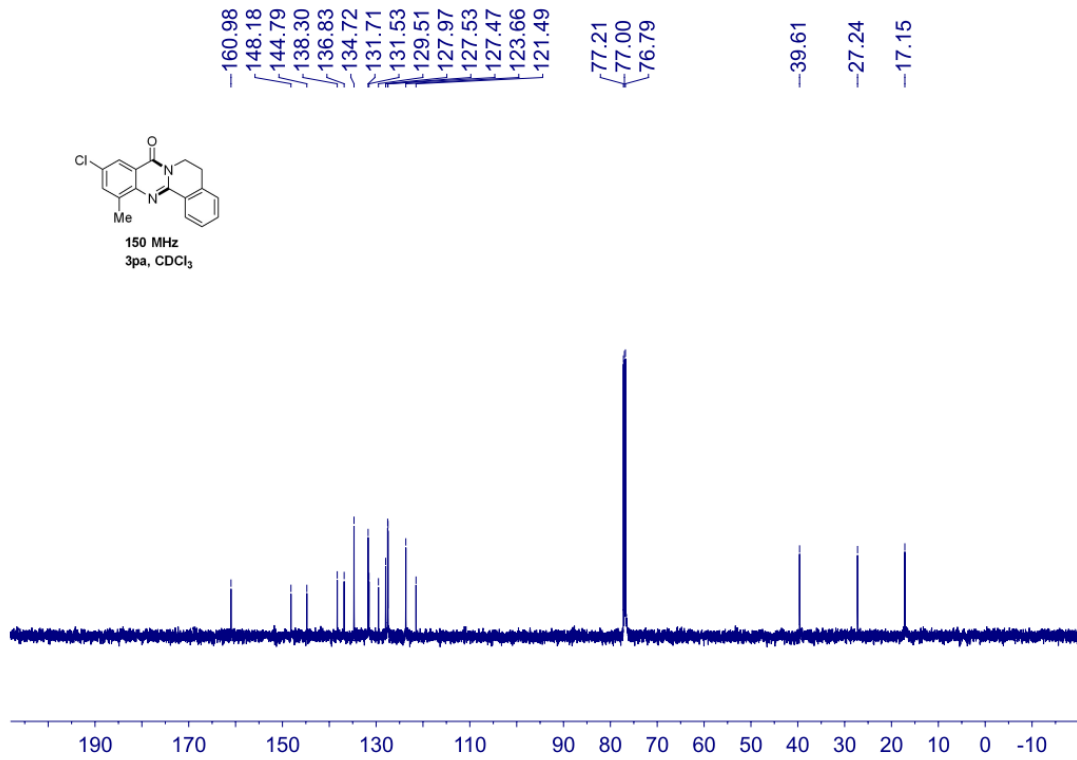

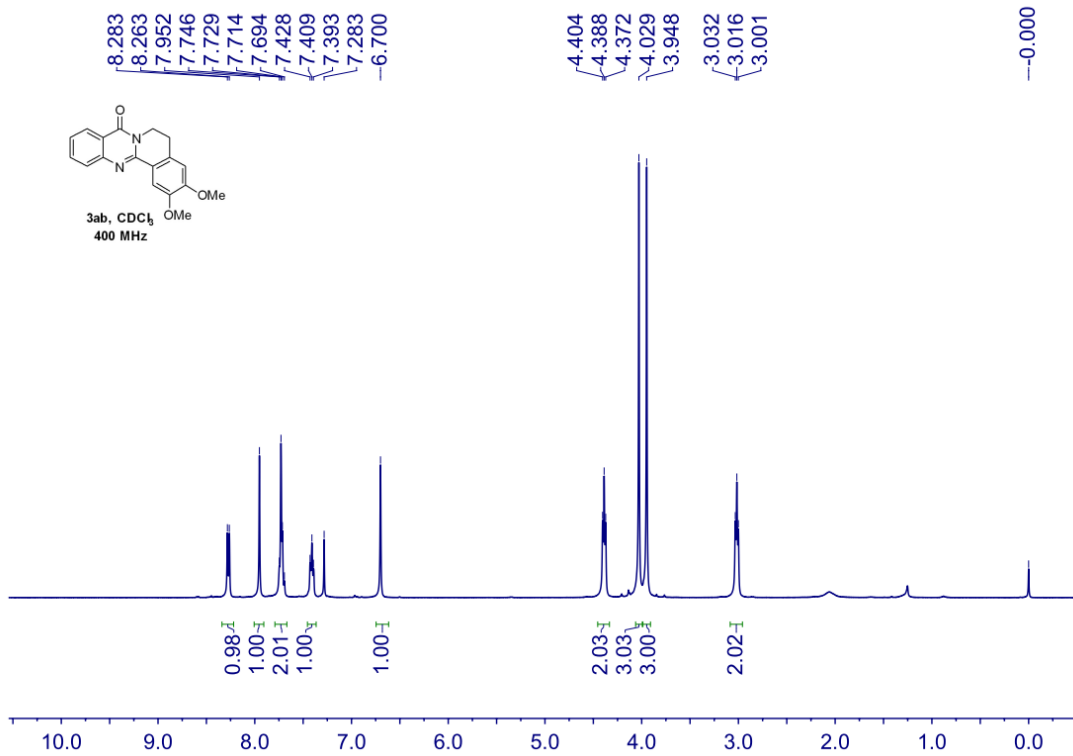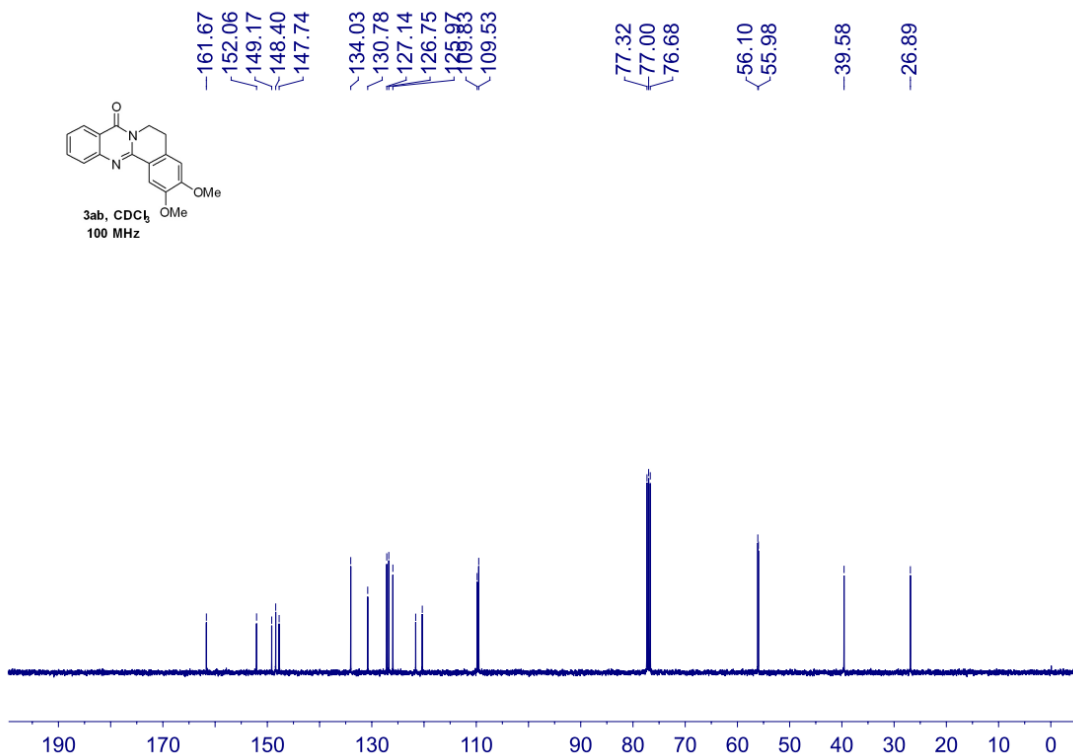

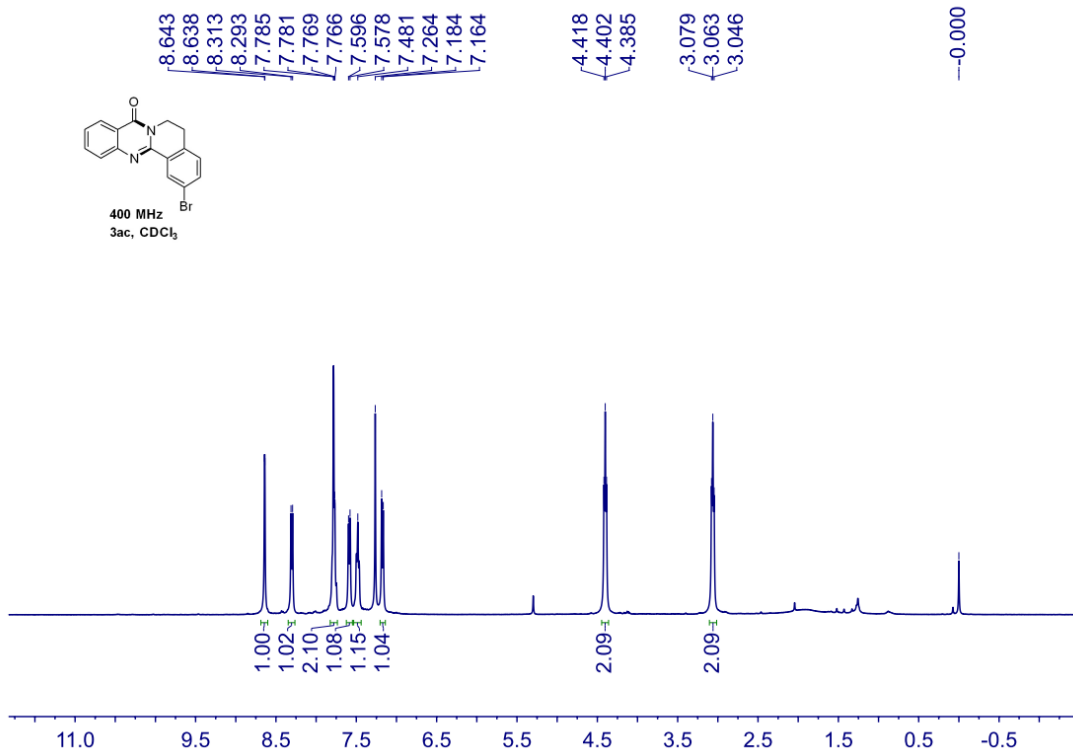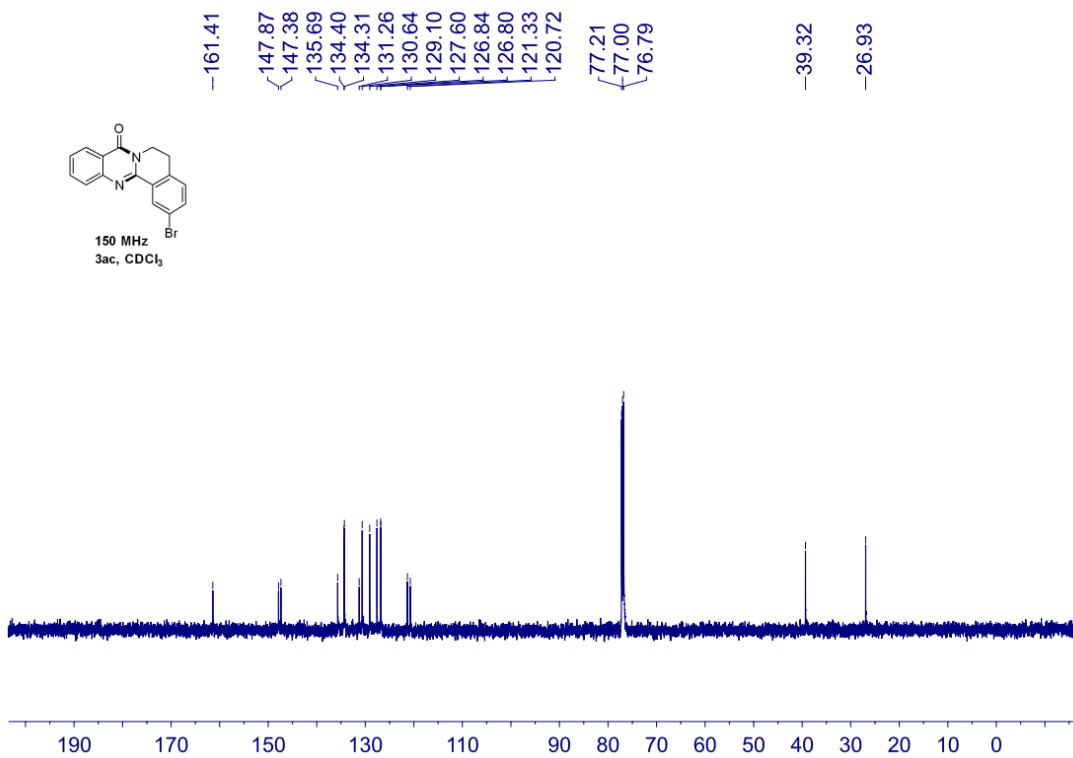

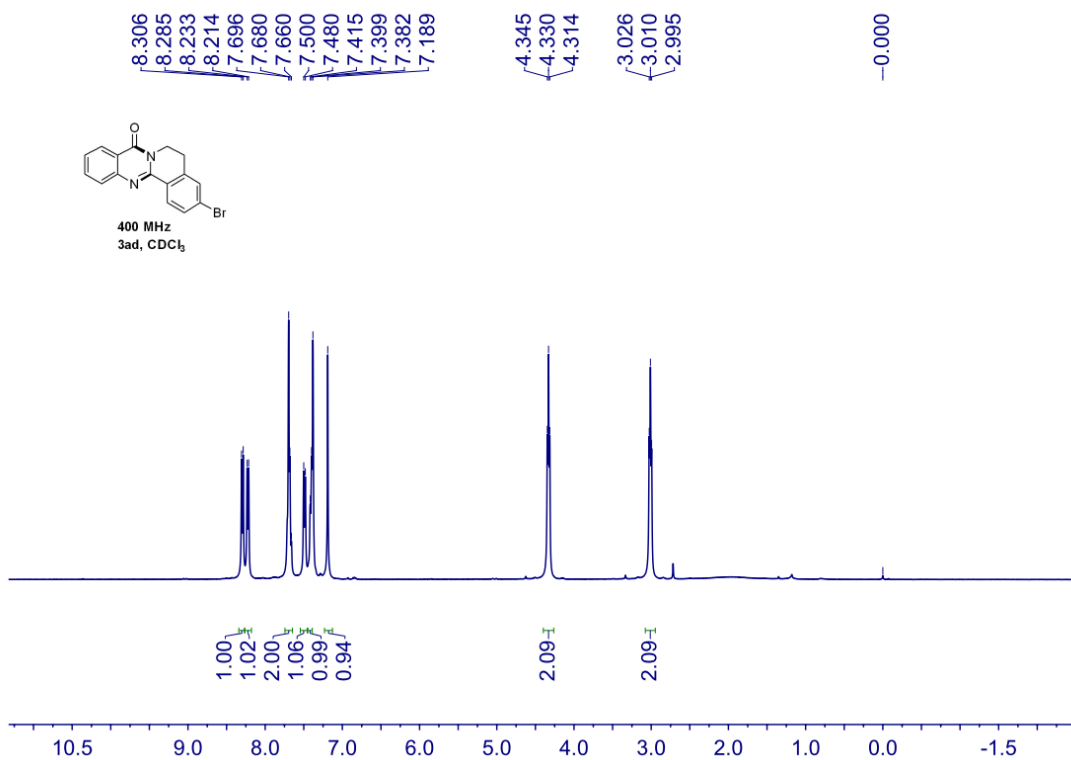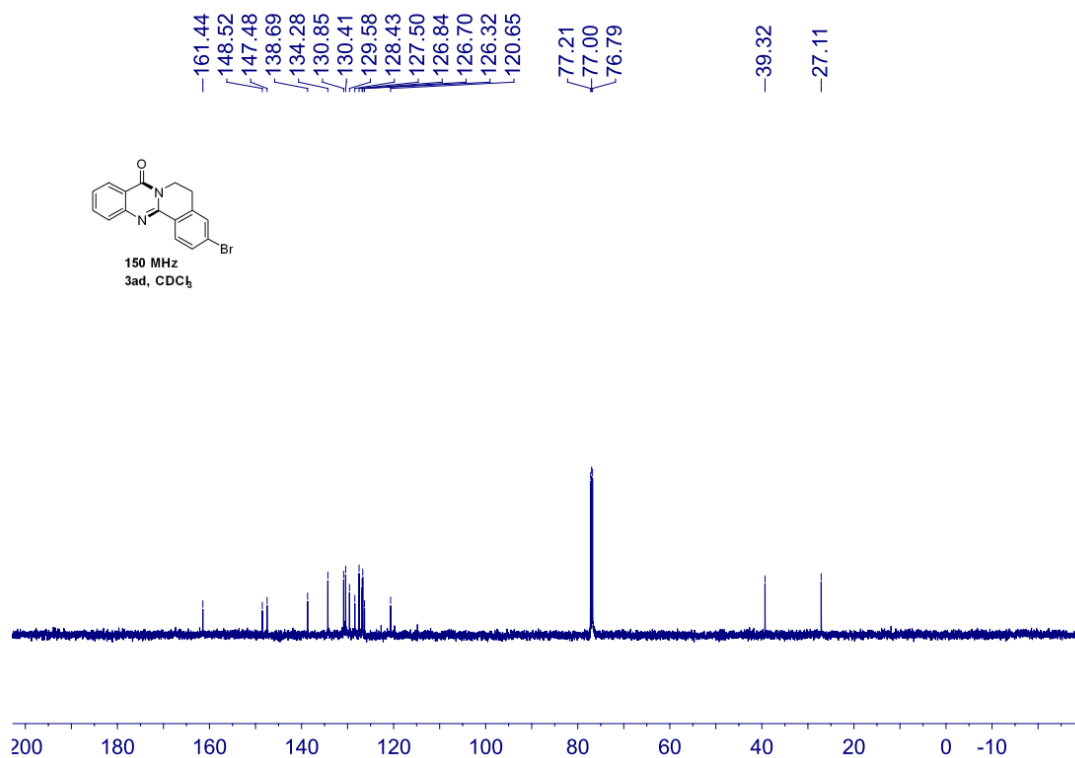

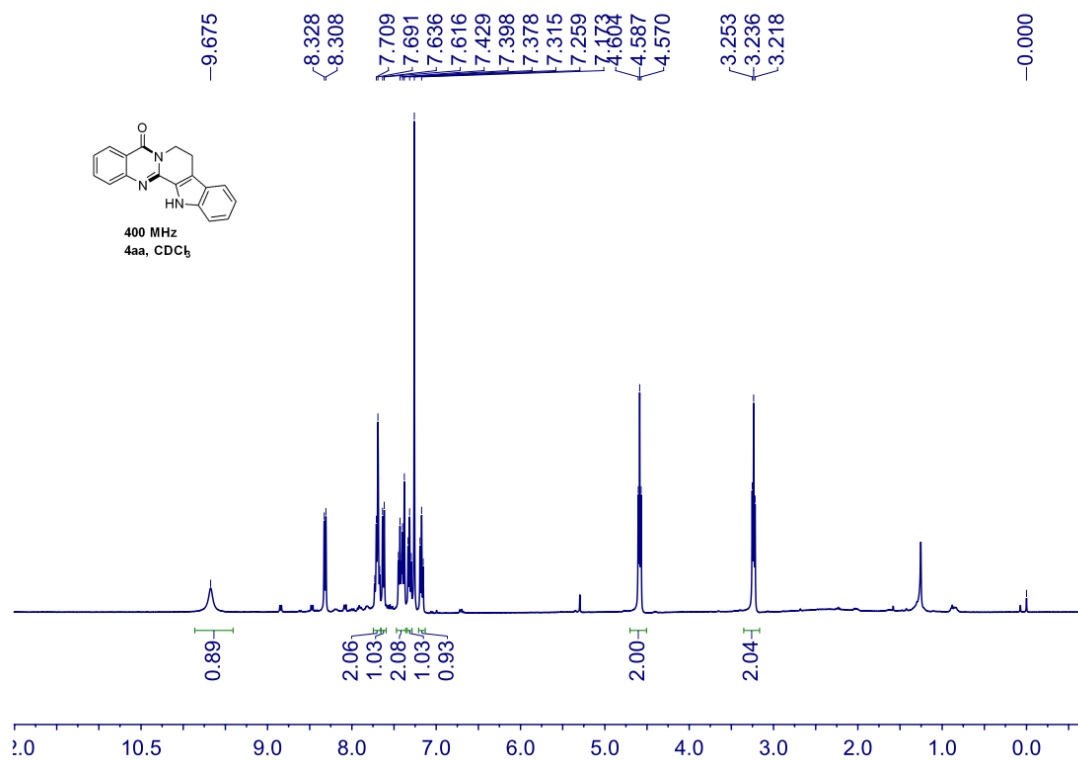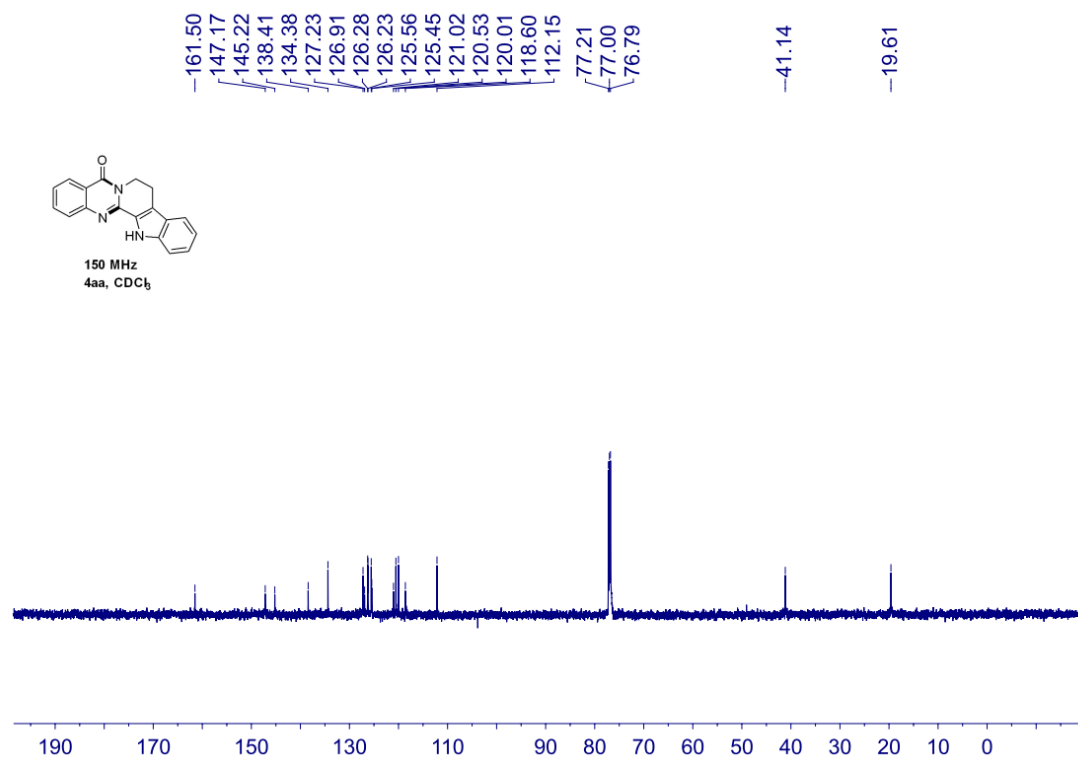

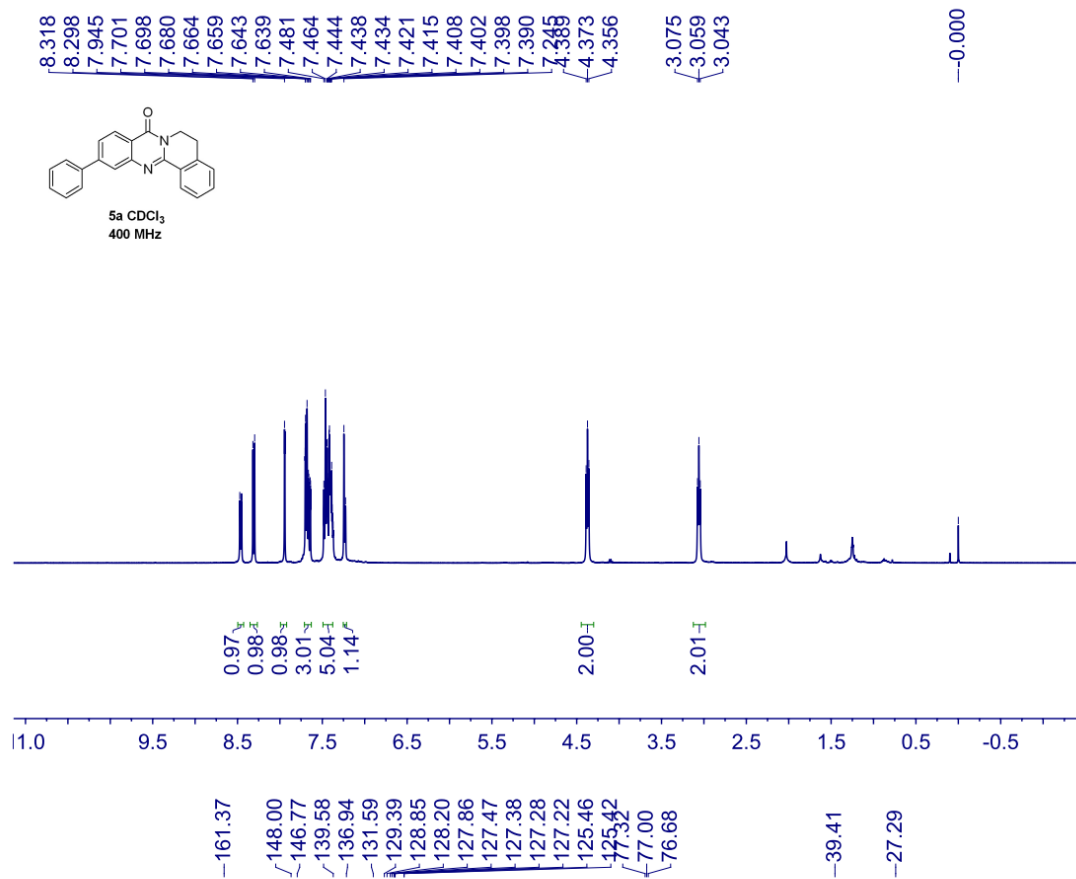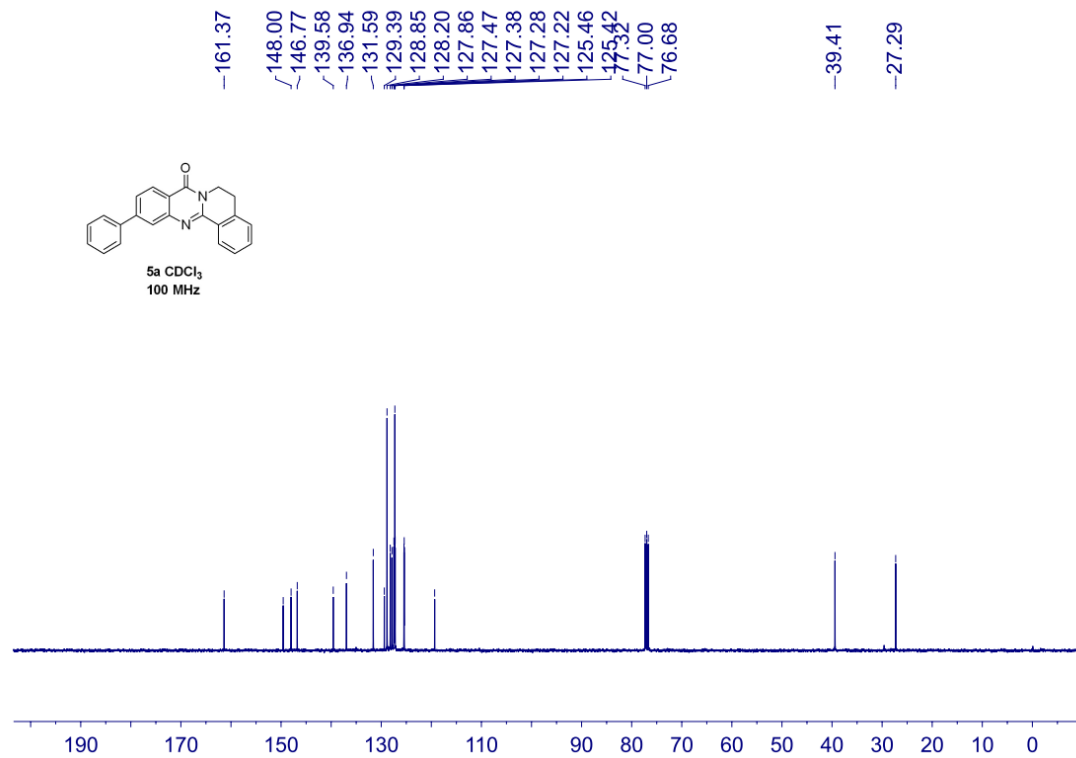

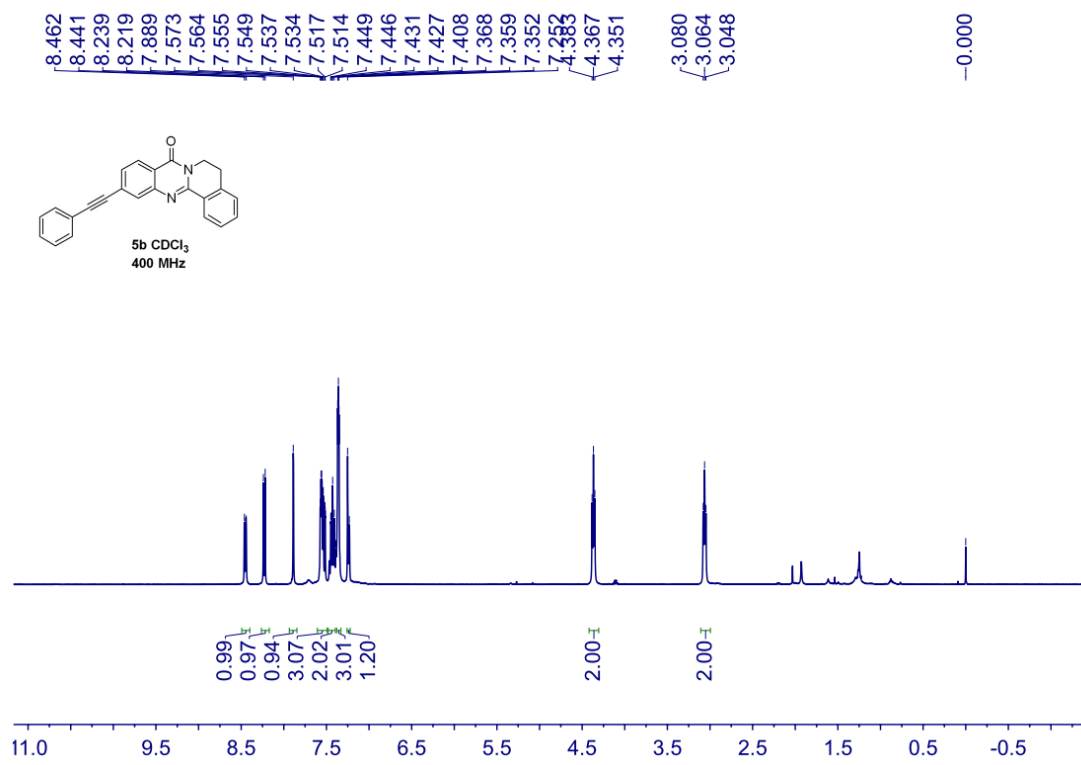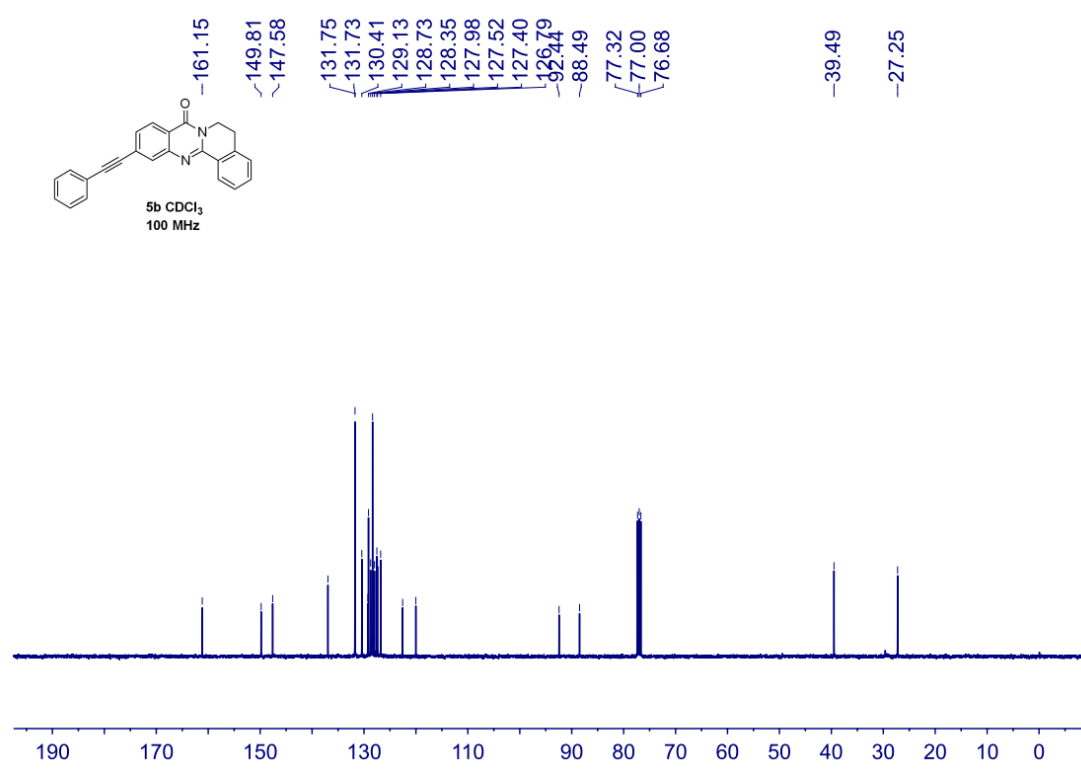

Supplement: d0qo00345j1.pdf [file d0qo00345j1.pdf]
